1 **Innate Antifungal Immune Receptor, Dectin-1, Undergoes Ligand-Induced**  
2 **Oligomerization with Highly Structured  $\beta$ -Glucans and at Fungal Cell Contact**  
3 **Sites**

4

5 Authors:

6 **Eduardo U. Anaya<sup>1</sup>, Akram Etemadi Amin<sup>1,2</sup>, Mike Danielson<sup>3</sup>, Kyle Michel<sup>3</sup>, Aaron**  
7 **K. Neumann<sup>1,4</sup>**

8 Affiliations:

9 1. Department of Pathology, University of New Mexico, School of Medicine,  
10 Albuquerque, NM, USA, 87131

11 2. Department of Physics and Astronomy, University of New Mexico, Albuquerque, NM,  
12 USA 87131

13 3. ImmunoResearch Inc., Eagan, MN, USA, 55121

14 4. Corresponding author: [akneumann@salud.unm.edu](mailto:akneumann@salud.unm.edu)

15

16 **Keywords:**

17 Dectin-1, dimer, beta-glucan, *Candida albicans*, hemITAM, Syk, Calcium signaling,  
18 FRET, RICS, N&B

19

20

## 21 **Author Summary**

22 Candidemia is the most common bloodstream infection in the United States. During  
23 infection, the fungal cell wall is an important virulence factor, playing roles in adhesion,  
24 immune recognition and colonization. The human innate immune system recognizes  $\beta$ -  
25 glucan, a highly immunogenic component of the fungal cell wall. During innate immune  
26 recognition of *Candida*, the organization of cell wall  $\beta$ -glucan is an important  
27 determinant of a successful immune activation. However, there have been many reports  
28 showing conflicting biological activities of  $\beta$ -glucans with different size, branching and  
29 structure. Here, using quantitative fluorescence imaging techniques, we investigate how  
30 differential size and structure of  $\beta$ -glucan impacts activation of the innate immune  
31 receptor, Dectin-1A. Our results indicate a positive correlation between highly structured  
32 glucans and Dectin-1A activation. Furthermore, we determined this is due to the higher  
33 ordered  $\beta$ -glucan causing Dectin-1A receptors to form aggregates that are below 15 nm  
34 in size. Finally, Dectin-1A receptor aggregation has also been shown to form at fungal  
35 particle contact sites with high  $\beta$ -glucan exposure.

## 36 **Abstract**

37 Dectin-1A is a C-type Lectin innate immunoreceptor that recognizes  $\beta$ -(1,3:1,6)-glucan,  
38 a structural component of *Candida* species cell walls. The higher order structure of  $\beta$ -  
39 glucans ranges from random coil to insoluble fiber due to varying degrees of tertiary  
40 (helical) and quaternary structure. Model *Saccharomyces cerevisiae*  $\beta$ -glucans of  
41 medium and high molecular weight (MMW and HMW, respectively) are highly  
42 structured. In contrast, low MW glucan (LMW) is much less structured. Despite similar  
43 affinity for Dectin-1A, the ability of glucans to induce Dectin-1A mediated calcium influx

44 and Syk phosphorylation positively correlates with their degree of higher order structure.  
45 Chemical denaturation and renaturation of MMW glucan showed that glucan structure  
46 determines agonistic potential, but not binding affinity, for Dectin-1A. We explored the  
47 role of glucan structure on Dectin-1A oligomerization, which is thought to be required for  
48 Dectin-1 signaling. Glucan signaling decreased Dectin-1A diffusion coefficient in inverse  
49 proportion to glucan structural content, which was consistent with Dectin-1A  
50 aggregation. Förster Resonance Energy Transfer (FRET) measurements revealed that  
51 molecular aggregation of Dectin-1 occurs in a manner dependent upon glucan higher  
52 order structure. Number and Brightness analysis specifically confirmed an increase in  
53 the Dectin-1A dimer and oligomer populations that is correlated with glucan structure  
54 content. Receptor modeling data confirms that in resting cells, Dectin-1A is  
55 predominantly in a monomeric state. Super Resolution Microscopy revealed that  
56 glucan-stimulated Dectin-1 aggregates are very small (<15 nm) collections of engaged  
57 receptors. Finally, FRET measurements confirmed increased molecular aggregation of  
58 Dectin-1A at fungal particle contact sites in a manner that positively correlated with the  
59 degree of exposed glucan on the particle surface. These results indicate that Dectin-1A  
60 senses the solution conformation of  $\beta$ -glucans through their varying ability to drive  
61 receptor dimer/oligomer formation and activation of membrane proximal signaling  
62 events.

63

## 64 **Introduction**

65 Overall, *Candida* infections have increased over the past 20 years in the United States  
66 [1–5]. It is estimated that 46,000 cases of healthcare-associated invasive candidiasis

67 occur in the United States annually [6]. The fungal cell wall is composed of an inner  
68 layer of chitin, a middle layer of  $\beta(1,3:1,6)$ -D-glucan and an outer layer of N- and O-  
69 linked mannans [7]. During infection, the cell wall of *Candida* is an important and  
70 relevant virulence factor, playing roles in adhesion, colonization and immune recognition  
71 [8,9]. Due to the abundant amount of mannan on the cell wall,  $\beta$ -glucan exhibits a very  
72 limited, punctate pattern of nanoscale surface exposure. The extent of this glucan  
73 masking is influenced by environmental conditions such as intestinal pH or lactate levels  
74 [10,11]. In addition, interactions with neutrophils have been shown to “unmask” the  
75 mannose layer through a neutrophil extracellular trap-mediated mechanism [12].  
76 Furthermore, our lab and others have determined that anti-fungal drugs “unmask” the  
77 fungal cell wall, which leads to increases in nanoscale regions of glucan exposure and  
78 correlates with enhanced host defense [13–15]. Therefore, fungal species use masking  
79 as a way to evade recognition of  $\beta$ -glucan by the host’s immune system [16].

80  $\beta$ -glucans consist of a  $\beta$ -1,3-linked backbone with side chains of  $\beta$ -1,6-linked units that  
81 vary in length and degree of branching [17].  $\beta$ -glucan forms triple-helical structures  
82 through intermolecular hydrogen bonds with two other strands [17–21]. This triple helix  
83 conformation has been shown to form with just the  $\beta$ -1,3-linked backbone, however  $\beta$ -  
84 1,6-linked side chains play an important role in determination of the triple helix cavity  
85 formation through side chain/side chain interactions [21].

86  $\beta$ -glucans are known for their biological activities such as enhancing anti-tumor, anti-  
87 bacterial, and anti-viral immunity as well as in wound healing [22–25]. The biological  
88 activity of glucan is affected by its structure, size, chemical modification, conformation  
89 and solubility [26]. Research has found that branching is not required to observe

90 biological activity, but branching has been shown to enhance binding to the Dectin-1  
91 receptor [27]. In contrast,  $\beta$ -glucan size is thought to play a major role in biological  
92 activity with glucans that are shorter than 10,000 Da often being biologically inactive  
93 [28,29]. However, despite having similar sizes, glucans can display differences in their  
94 biological activities [30–32]. For example, studies have demonstrated that the  
95 immunoregulatory activity of laminarin varies between agonistic and antagonistic  
96 depending on its physicochemical properties, purity and structure [33]. Furthermore,  $\beta$ -  
97 glucans that have a triple helical conformation are more potent agonists of host immune  
98 response than single helical glucan [34–37]. We propose that the  $\beta$ -glucan triple-helix  
99 conformation plays an important role in determining the biological activity of the  $\beta$ -  
100 glucan through modulating the degree of receptor oligomerization upon ligation.

101 During innate immune recognition of *Candida*, the organization of cell wall ligands and  
102 pattern recognition receptors is an important determinant of successful immune  
103 activation [8]. The C-type lectin (CTL) anti-fungal immunoreceptors play a central role in  
104 the detection of *Candida* during bloodstream infection [38]. Dectin-1A is the main CTL  
105 that recognizes the soluble and particulate  $\beta$ -glucan found in the fungal cell wall [39–  
106 41]. Dectin-1A is found in myeloid lineage cells, and once activated, it stimulates  
107 phagocytic activity, the production of reactive oxygen intermediates and inflammatory  
108 mediators. Dectin-1A contains a CTL-like domain, separated from the cell membrane by  
109 a glycosylated stalk region, a transmembrane domain and an intracellular cytosolic  
110 domain. The cytosolic tail contains half an Immunoreceptor Tyrosine-based Activation  
111 Motif (a YXXL sequence with an upstream stretch of acidic amino acids) in its  
112 cytoplasmic tail and so is termed a (hem)ITAM receptor [42,43]. Monophosphorylated

113 ITAM domains poorly recruit and activate Syk for downstream signaling [44], suggesting  
114 that hemITAM domains with their single phosphotyrosine site would be poorly activating  
115 in a monomeric configuration. Consistent with this hypothesis, another (hem)ITAM  
116 bearing receptor, CLEC-2, is reported to require dimerization for its signaling [45]. By  
117 analogy to this and other (hem)ITAM receptors, it is hypothesized that Dectin-1A must  
118 oligomerize to recapitulate a multivalent binding site for Syk and to facilitate signal  
119 transduction [8,45,46]. However, this prediction has not been directly explored for  
120 Dectin-1A in live cells at the molecular level with relation to structural determinants of  
121 receptor-ligand complex organization and signaling outcomes.

122 In this study, we propose that factors that induce an aggregated membrane organization  
123 of Dectin-1A during activation are very important for determining signaling outcomes of  
124 Dectin-1A engagement by  $\beta$ -glucan [45,46]. We hypothesize that ligand structure  
125 impacts signaling by determining the membrane organization and spatiotemporal  
126 clustering dynamics of Dectin-1A. To test this hypothesis, we stimulated HEK-293 cells  
127 transfected with Dectin-1A with a variety of soluble  $\beta$ -glucans that have different  
128 structures and sizes. We chose to work in this model system because it provides a  
129 simplified platform necessary to investigate the physical biology of Dectin-1A activation  
130 by isolating Dectin-1A signaling from the complex milieu of other receptors and other  
131 Dectin-1 isoforms expressed in innate immunocytes. Also, this model facilitates the  
132 expression of multiple fluorescent protein-tagged Dectin-1A constructs necessary to the  
133 work. Using calcium imaging and western blotting assays, our results revealed that  
134 Dectin-1A activation is influenced by the  $\beta$ -glucan triple helical structure. Furthermore,  
135 our subcellular FRET measurements by Fluorescence Lifetime Imaging Microscopy

136 (FLIM-FRET), as well as application of fluorescence correlation spectroscopy  
137 approaches, revealed dimerization and oligomerization of Dectin-1A when stimulated  
138 with highly structured  $\beta$ -glucans. In addition, these dimerization events occurred in  
139 fungal contact sites of fungal cells with high glucan exposure. Together, our findings  
140 indicate  $\beta$ -glucan structure is required for Dectin-1A to form signaling-competent dimeric  
141 and oligomeric membrane aggregates.

142

### 143 **Results:**

#### 144 **Dectin-1A activation is dependent on the molecular weight of the soluble $\beta$ -** 145 **glucan.**

146  $\beta$ -glucans, existing as insoluble fibers in the cell wall, are likely to have a high degree of  
147 tertiary and quaternary structure. So, an encounter with highly structured glucan might  
148 be indicative of a pathogen cell wall structure. Furthermore, less structured glucans are  
149 encountered by Dectin-1A physiologically [42]. Small soluble circulating glucan can  
150 derive from sloughed cell wall material or from dietary absorption [47–50]. However,  
151 there is not much known about Dectin-1A's ability to distinguish between highly  
152 structured  $\beta$ -glucan found on cell walls of fungal pathogens and less structured glucans  
153 found in circulation. Therefore, we examined how Dectin-1A activation is affected by  
154 glucans with different quaternary and tertiary structures. To accomplish this, we used  
155 high molecular weight (HMW 450 kDa), medium molecular weight (MMW 145 kDa), and  
156 low molecular weight (LMW 11 kDa) soluble glucans, in decreasing order of tertiary and  
157 quaternary structures, derived from *S. cerevisiae* cell walls. These *S. cerevisiae* glucans

158 in soluble form or as particulate “zymosan” are common models for stimulation of innate  
159 immunocytes by fungal pathogen cell wall glucan. The above glucans have overall very  
160 similar composition and structures to *C. albicans* yeast glucan, though relatively minor  
161 differences in  $\beta$ -(1,6)-glucan side chain length and branching frequency have been  
162 reported between these species [51,52].

163 Using these glucans, we performed intracellular calcium ( $[Ca^{2+}]_i$ ) measurement  
164 experiments using HEK-293 cells transfected with Dectin-1A. We stimulated the cells  
165 using either LMW, MMW, or HMW (Fig.1A). We found that large, highly ordered glucans  
166 (HMW and MMW) induced more than a two-fold increase in peak amplitude of  $[Ca^{2+}]_i$ . In  
167 contrast, the glucans with a random coil structure (LMW) showed little induction of  
168 calcium signaling compared to unstimulated cells. These results indicate that Dectin-1A  
169 drives differential  $Ca^{2+}$  flux to glucan ligands that vary in size and structure.

170 To determine how these differently structured soluble glucans impacted cellular patterns  
171 of Syk phosphorylation, we stimulated HEK-293 cells expressing Dectin1A-mEmerald  
172 with  $H_2O$  (vehicle), LMW, MMW, or HMW. Whole cell lysate was collected and Syk  
173 phosphorylation was determined by western blot analysis. Likewise, our results show an  
174 increase in Syk phosphorylation in the larger, highly structured glucan MMW and HMW  
175 compared to unstimulated and LMW stimulated cells (Fig. 1B). Additionally, Syk  
176 inhibitors abrogated calcium signaling of Dectin-1A when stimulated with MMW glucan  
177 (Fig. 1C). These results indicate that glucans with higher order structure are better able  
178 to activate Dectin-1A-mediated  $Ca^{2+}$  signaling and that this is a Syk dependent process.



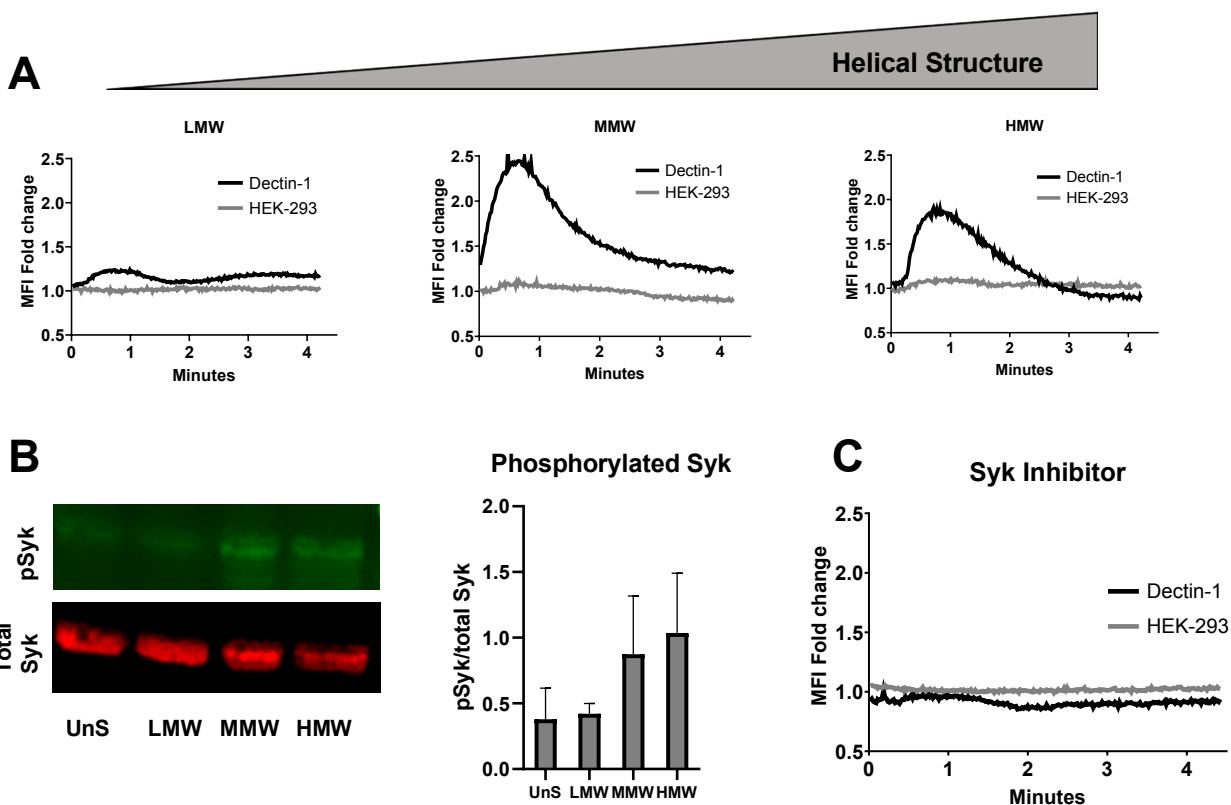

179

180 **Figure 1. Differential signaling response to soluble  $\beta$ -glucan for Dectin-1A.**

181 (A) HEK-293 cells stably transfected with Dectin-1A were loaded with Fluo-4 and Cell Tracker Deep Red  
182 at equimolar concentrations. Cell Tracker Deep Red was simultaneously loaded in order to normalize for  
183 changes in cytosolic volume caused from cell movement during observation. Mean fluorescence intensity  
184 was observed for Dectin-1A transfected (black) or untransfected (grey) HEK-293 cells stimulated with  
185 LMW, MMW, or HMW at 1  $\mu$ g/ml. (n = 30 per glucan from 3 independent experiments per glucan). Data  
186 shown as mean fold change in volume-normalized  $[Ca^{2+}]_{intracellular}$ . (B) Cell lysates were collected at 5 min  
187 after stimulation and analyzed by Western blotting using antibodies against p-Syk and Syk. The intensity  
188 of p-Syk was normalized against total Syk. Representative western blot on the left. Quantification of the  
189 western blot data (right) shown as mean  $\pm$  SD are relative intensity of p-Syk (n = 3). (C) Untransfected  
190 (grey) and stably transfected Dectin-1A (black) HEK-293 cells were loaded with Fluo-4 and Cell Tracker  
191 Deep Red at equimolar concentrations and treated with Syk Inhibitor at 250 nM and stimulated with

192 MMW. Mean fluorescence intensity was observed for cells stimulated with MMW at 1 ug/ml. (n = 30 from  
193 3 independent experiments).

194

### 195 **$\beta$ -glucan denaturation does not induce Dectin-1A activation**

196 To specifically determine if the glucan structure affects signaling outcomes, we  
197 denatured MMW (highly stimulatory glucan) using DMSO, which inhibits the formation of  
198 tertiary structures, thus converting MMW's triple helix structure to a single helical  
199 structure [17]. The results showed that when we denatured these glucans, we did not  
200 observe calcium signaling in cells expressing Dectin-1A (Fig. 2A). However, when we  
201 renatured the glucans by removing DMSO via dialysis we observe partial recovery of  
202 calcium signaling. In addition, we confirmed the loss of helical structure via a Congo  
203 Red assay. Congo Red specifically binds to  $\beta$ -1,3-D-glucans with a triple helix  
204 conformation as their tertiary structure. This binding is detected by bathochromic shift in  
205 absorbance maximum from 488 to 516 nm [53]. Our results indicated a loss in glucan  
206 structure after denaturation in a DMSO solution that was regained upon renaturation  
207 (Fig. 2B). Moreover, we repeated these experiments by stimulating cells with glucan  
208 denatured with NaOH or neutralized renatured glucan [17]. Similarly, our results show  
209 that denatured MMW does not stimulate Dectin-1A signaling, but agonistic potential of  
210 this glucan is partially regained when the glucan is renatured (Fig. 2C). In addition, we  
211 confirmed that glucan structure was lost when NaOH was added and regained when  
212 neutralized with HCl (Fig. 2D). These results suggest that glucan structure is an  
213 important factor in activating a Dectin-1A response.

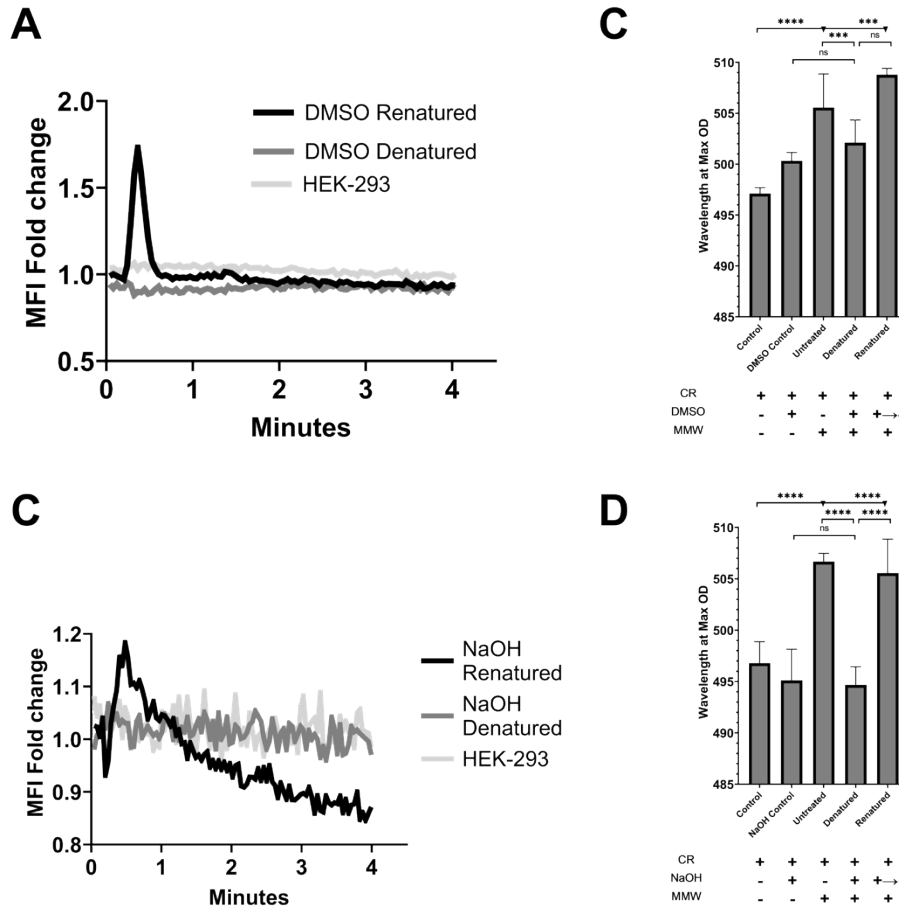

214

215 **Figure 2: Denaturation of highly structured glucan causes it to lose its**  
 216 **stimulatory potential.**

217 (A) HEK-293 cells stably expressing Dectin-1A or untransfected were loaded with Fluo-4 and Cell Tracker  
 218 Deep Red at equimolar concentrations. Mean fluorescence intensity was observed for cells stimulated  
 219 with DMSO denatured/renatured MMW. (n = 30 from 3 independent experiments). (B) 1 mg/ml of MMW  
 220 glucan was denatured using DMSO and incubated with 8 $\mu$ M Congo Red. Control samples contained  
 221 Congo Red with and without DMSO to illustrate the extent of red shift attributable to solvent effects alone.  
 222 Renaturation was accomplished by dialyzing out DMSO 24 hrs prior to the experiment. Data shown as  
 223 mean  $\pm$  SD (n = 9 from 3 independent experiments). (C) HEK-293 cells stably expressing Dectin-1A or  
 224 untransfected were loaded with Fluo-4 and Cell Tracker Deep Red at equimolar concentrations. Mean  
 225 fluorescence intensity was observed for cells stimulated with NaOH denatured/renatured MMW at 1

226 ug/ml. (n = 30 from 3 independent experiments). Data shown as mean. (D) 1 mg/ml of MMW glucan was  
227 denatured using NaOH and incubated with 8  $\mu$ M Congo Red. Control samples contained Congo Red with  
228 and without Congo Red to assess denaturant effect on the optical properties of the dye, but the presence  
229 of denaturant had no significant effect on Congo Red in this case. Renaturation was accomplished by  
230 neutralizing NaOH 24 hrs prior to the experiment. Data shown as mean  $\pm$  SD (n = 9 from 3 independent  
231 experiments). Welch's t-test, \*\* p<0.001, \*\*\* p<0.0001, \*\*\*\* p<0.000001.

### 232 **$\beta$ -glucan structure and affinity**

233 We considered the possibility that these soluble glucans might have different affinities  
234 for Dectin-1A, resulting in differential receptor activation. Thus, we conducted Biolayer  
235 Interferometry experiments to determine the binding affinity of these glucans to the  
236 carbohydrate recognition domain of Dectin-1A. This was accomplished using a chimeric  
237 fusion protein of the carbohydrate recognition domain of Dectin-1A and the human IgG  
238 Fc region. An anti-human IgG Fc Capture biosensor tip was used to load this fusion  
239 protein. Association and dissociation curves of the soluble glucan were then collected.  
240 The results shown in Fig. 3A indicate that all the glucans have approximately nanomolar  
241 dissociation constants for Dectin-1A carbohydrate recognition domain despite the  
242 previously described differences in signaling [27]. Weight average molecular weights of  
243 purified *Saccharomyces cerevisiae*  $\beta$ -(1,3)-glucan fractions vary over an approximate  
244 40-fold range, but there is relatively little difference between these glucans' apparent  
245 affinity for the Dectin-1A carbohydrate recognition domain.

246 Furthermore, to quantify differences in the helical structure possessed by LMW, MMW  
247 and HMW glucans, we analyzed the conformational transition of triple helix to random  
248 coil of  $\beta$ -1,3-D-glucans through denaturation experiments. Experiments were conducted  
249 by denaturing glucans with NaOH at various concentrations in the presence of Congo

250 Red. Our results show that the amount of glucan tertiary structure scales with molecular  
251 weight as measured by the concentration of NaOH required to reduce Congo Red  
252 binding to glucan to half-maximal values (Fig. 3B), suggesting that the size of the  
253 glucans is correlated with their structure. This result was expected because larger  
254 glucans are able to engage in more extensively in interstrand hydrogen bonding  
255 interactions that maintain triple helical structures. Together, these results indicate that  
256 downstream signaling of the receptor is determined by the structure of the glucan rather  
257 than affinity alone.

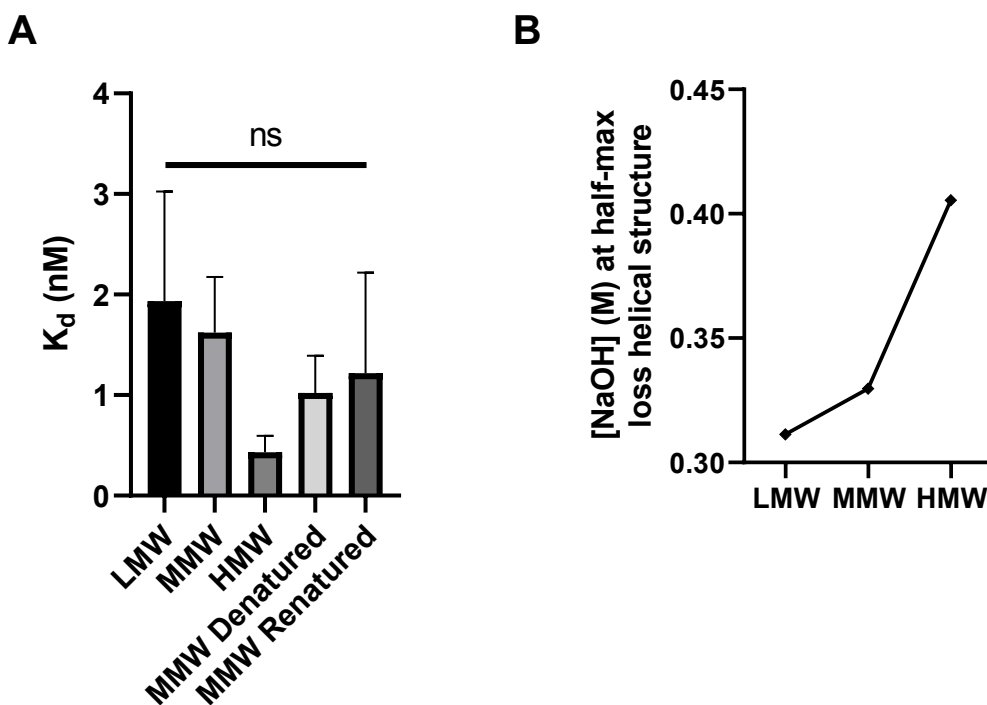

258

259 **Figure 3: Characterization of fungal cell wall glucans used in this study.**

260 **Characterization of untreated, denatured and renatured  $\beta$ -glucans.**

261 (A) Biolayer Interferometry experiments were conducted on LMW, MMW, HMW, MMW denatured, and  
262 MMW renatured glucans using an anti-human IgG Fc Capture biosensors tip and a Dectin-1A-Fc fusion

263 protein. Data shown as mean  $\pm$  SD (n = 3 from 3 independent experiments). (B) LMW, MMW, and HMW

264  $\beta$ -glucans were denatured using 0M-1M of NaOH in the presence of 8.8  $\mu$ M Congo Red. Concentration of  
265 NaOH at which absorbance decreased to the half-maximal value were plotted. Data shown as mean  $\pm$  SD  
266 (n = 9 from 3 independent experiments); One-way ANOVA test was conducted.

267

268 **Dectin-1A decreases in diffusion and receptor density when stimulated with**  
269 **highly structured  $\beta$ -glucans**

270 The Stokes-Einstein equation predicts that if a diffusing object increases in  
271 hydrodynamic radius, it will slow down proportionally to that change. We measured the  
272 diffusion coefficient of Dectin-1A pre/post glucan stimulation to determine whether  
273 receptor diffusion coefficient decreased, potentially due to increasing hydrodynamic  
274 radius as an initially monomeric receptor formed larger clusters/oligomers. We obtained  
275 average diffusion coefficients and spatial number density of our receptor using Raster  
276 Image Correlation Spectroscopy (RICS). Previous research has described RICS in  
277 more detail [54,55]. Briefly, we generated a volume of excitation using a confocal laser  
278 and calibrated this volume using standard fluorophores of known diffusion coefficient.  
279 We then observed fluorescent molecules (i.e., Dectin-1A-mEmerald) diffusing in and out  
280 of this excitation volume through fluctuation in the number of photons obtained.  
281 Experimentally observed fluorescence correlations at various spatiotemporal lags were  
282 then fit to a 2D autocorrelation function to obtain receptor diffusion coefficient and  
283 spatial density in the observed membrane.

284 Using HEK-293 cells expressing Dectin-1A-mEmerald, we conducted RICS  
285 measurements before and after stimulation with soluble  $\beta$ -glucans. We determined that  
286 cells stimulated with MMW or HMW exhibited a significant decrease in mobility

287 compared to LMW and unstimulated cells (Fig. 4A). This finding is consistent with an  
288 increase in receptor aggregation upon stimulation, which we examine in greater detail  
289 below. Moreover, we observed a significant decrease in receptor density after treatment  
290 with MMW or HMW, compared to non-stimulated or LMW cells (Fig. 4B). This finding  
291 might be explained by receptor internalization after stimulation by MMW or HMW. While  
292 RICS analysis does use detrending to remove immobile and very low mobility receptor  
293 from analysis, we do note that progressive confinement of activated receptors in  
294 nascent endocytic structures could also potentially contribute to the decreased apparent  
295 diffusion coefficient we observed post-stimulation. So, we proceeded to conduct more  
296 detailed membrane biophysical studies to specifically assess the molecular aggregation  
297 state of Dectin-1 during stimulation with glucan.

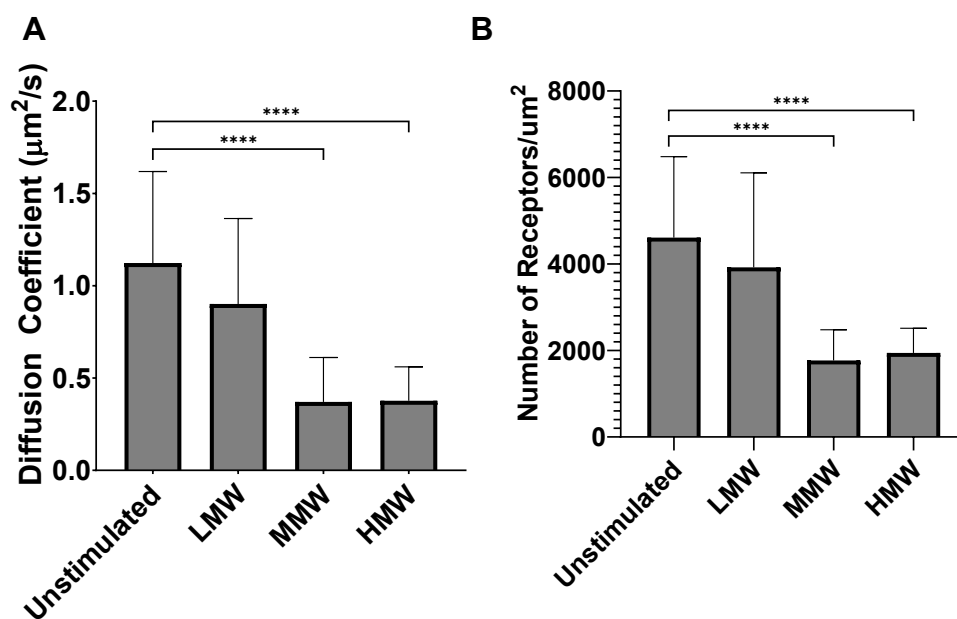

298

299 **Figure 4: Dectin-1A surface diffusion and receptor numbers decrease when**  
300 **stimulated with highly structured  $\beta$ -glucans.**

301 (A). Raster Image Correlation Spectroscopy (RICS) analysis of fluorescently tagged Dectin-1A expressed  
302 in HEK-293 provided average diffusion coefficient and (B) average receptor number for cells that were  
303 unstimulated or stimulated with LMW, MMW, or HMW. Data shown as mean  $\pm$  SD (n = 30); One-Way  
304 ANOVA multiple comparison test, \*\*\*\* p<0.00001.

305

306 **Dectin-1A forms dimers/oligomers when stimulated with highly structured  $\beta$ -**  
307 **glucans**

308 The results shown above indicate that the  $\beta$ -glucan structure is an important factor in  
309 signaling outcomes. Previous research has shown that other transmembrane CTLs that  
310 also contain a (hem)ITAM domain can form homodimers before or upon ligand  
311 recognition [56,57]. Furthermore, crystallography studies of the carbohydrate  
312 recognition domain (CRD) have shown that Dectin-1A head groups form dimers when  
313 laminarin is present [58]. Additionally, size exclusion chromatography with multi-angled  
314 light scattering analysis has described Dectin-1 ligand-induced tetramer formation in  
315 solution [59]. In line with these ideas, we sought to examine how ligand structure  
316 impacts signaling by determining the dimerization/oligomerization of full length Dectin-  
317 1A in living cell membranes.

318 To accomplish this, we first employed Fluorescence-Lifetime Imaging Microscopy for  
319 Forster Resonance Energy Transfer (FLIM-FRET). FRET based imaging capitalizes on  
320 close proximity of two proteins to visualize protein-protein interactions, including  
321 receptor dimerization and receptor-ligand complex formation [60]. FLIM characterizes  
322 the duration of a fluorophore's excited state before returning to the ground state. The  
323 occurrence of FRET causes rapid quenching of donor fluorescence, so FRET can be



324 determined by measuring the shortening of donor fluorescence lifetime when in  
325 proximity to acceptor. FLIM-FRET offers the opportunity of studying *in vivo* receptor  
326 interactions in a direct, spatially resolved manner. We examined Dectin-1A engagement  
327 using FLIM-FRET on HEK-293 cells co-expressing fluorescent proteins Dectin-1A-  
328 mEmerald (donor) and -mCherry (acceptor). The proteins used for experimental  
329 determination of ligation-dependent Dectin-1A aggregation possessed fluorescent  
330 proteins on the protein N-terminus (cytoplasmic tail), while a negative control for FRET  
331 utilized donor and acceptor-tagged proteins on opposite sides of the membrane.  
332 Analysis was conducted on the plasma membrane itself by masking out internal cellular  
333 compartments (Fig. 5A). In the experiments, FRET efficiency is a parameter that  
334 exhibits an inverse 6th power dependence upon donor-acceptor distance. Donor-  
335 acceptor percentage is simply the percentage of all donors that are involved in FRET  
336 interactions at a given time. These parameters are determined experimentally by  
337 performing bi-exponential curve fits to the observed frequency distribution of donor  
338 fluorophore lifetimes, wherein one exponential component represents the population of  
339 non-FRET monomeric donors and the other exponential component represents the  
340 performance of the donors that are involved in FRET interactions.

341 First, we characterized the average lifetimes of unstimulated cells expressing several  
342 configurations of fluorescent protein tagged Dectin-1A: 1) receptor with donor tag only,  
343 2) co-expression of separate donor and -acceptor tagged receptors with tags placed on  
344 opposite sides of the plasma membrane (a negative control containing both fluorescent  
345 proteins but in a configuration that does not permit FRET), and 3) co-expression of  
346 separate donor and acceptor-tagged receptors with both tags in the cytoplasmic tail of

347 the receptors (configuration to be used for experimental determination of receptor  
348 aggregation by FRET). The observed decay curves were analyzed by performing a bi-  
349 exponential fit. For donor only (1) and our negative control (2), we observed a negative  
350 amplitude for one of the bi-exponential lifetime fit components, indicating that a mono-  
351 exponential fit was a more appropriate method of analysis. Our results showed that  
352 when acceptor was not present, we see an average of 2.4 ns lifetime (Fig. 5B).  
353 Negative controls with donor and acceptor on opposite sides of the membrane yielded  
354 similar lifetime values. FLIM data from cells with co-expression of donor or acceptor-  
355 tagged (cytoplasmic tail) Dectin-1A was fit bi-exponentially with the first component  
356 fixed to the donor only lifetime (2.4 ns) and the lifetime of the second component was  
357 reported. In this case, resting cells exhibited a decrease in the lifetime of the donor to  
358 0.41 ns indicating that some basal level of intermolecular Dectin-1 close proximity  
359 interactions were being observed in unstimulated cells. The existence of this basal  
360 FRET signal is interesting, and the potential sources and interpretation of this  
361 observation are considered in a section below. However, we first focused on assessing  
362 ligation-dependent changes in Dectin-1A's molecular aggregation state as influenced by  
363 various glucans and measured by FRET.

364 When we stimulated cells expressing Dectin-1A with donor and acceptor on the  
365 cytoplasmic face of the membrane using MMW (Fig. 5D) or HMW (Fig. 5E), we saw a  
366 significant increase in the number of receptors undergoing FRET (Donor-Acceptor  
367 population) from 15% before stimulation to a maximum of 30% after 5 minutes of  
368 stimulation, with observations starting at one minute post-stimulation. However, there  
369 was not a significant change in FRET efficiency before and after stimulation. On the

370 other hand, when we stimulate with LMW (Fig. 5C) or denatured MMW (Fig. 5F), we  
371 see no significant change in FRET efficiency or donor-acceptor population. We interpret  
372 the high and constant FRET efficiency for the population of receptors engaged in FRET  
373 interactions to mean that Dectin-1A in its aggregated state is in a close, well-defined  
374 configuration that does not permit a wide range of separations between donor and  
375 acceptor tags, leading to a constant FRET efficiency for the donor population that does  
376 attain this FRET-capable configuration. However, the size of the population of receptors  
377 engaged in these close molecular aggregates does change as a result of stimulation  
378 with glucan. These results suggest that the highly structured soluble glucans allow for  
379 an increase in Dectin-1A dimerization or oligomerization to occur, which directly  
380 correlates with the amount of receptor activation and signaling observed.

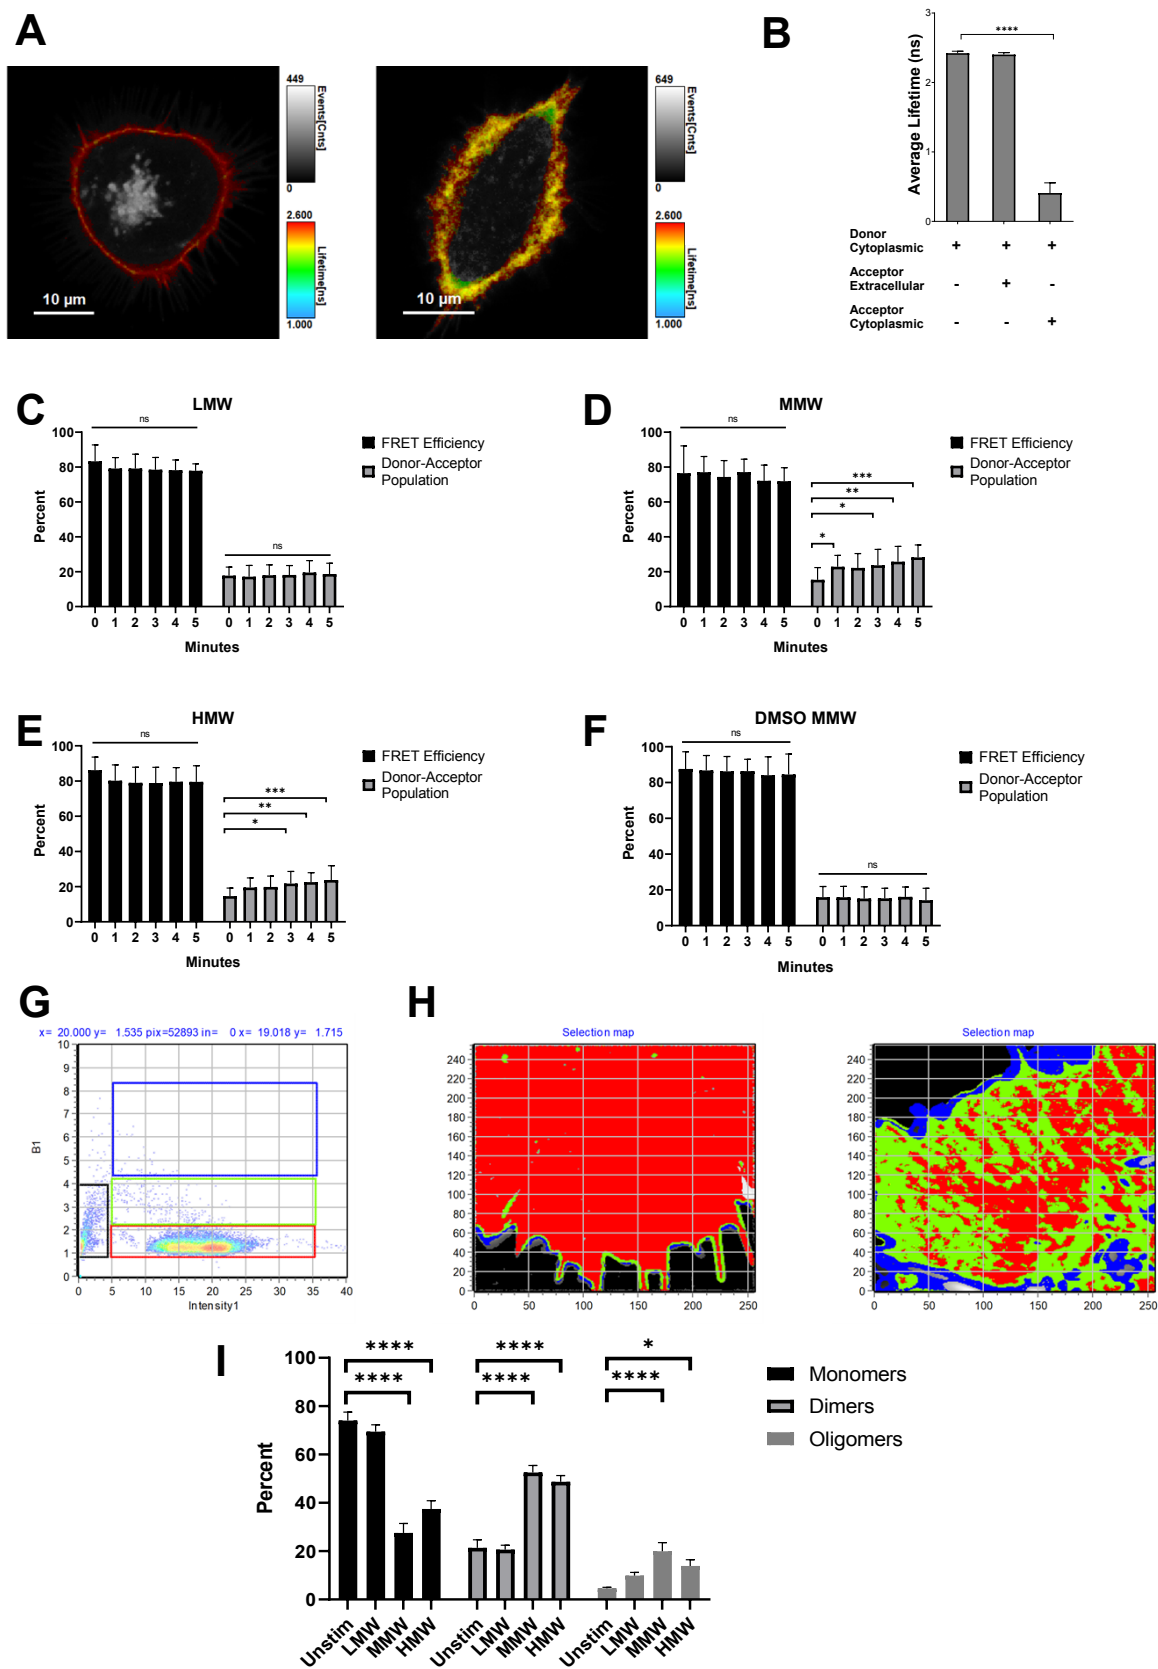

382 **Figure 5: Highly structured  $\beta$ -glucans induce dimerization of Dectin-1A.**

383 (A) Representative lifetime image of HEK-293 cell transfected with Dectin-1A-mEmerald (left panel) or  
384 cotransfected with Dectin-1A-mEmerald and Dectin-1A-mCherry (right panel). (B) Average lifetime of  
385 HEK-293 cells expressing donor only on the cytoplasmic face, donor expressed on the cytoplasmic side  
386 and acceptor on the extracellular side or donor-acceptor placed on the cytoplasmic side of the  
387 membrane. Decay curves for donor only and the negative control were mono-exponentially fit while  
388 cytosolic donor and acceptor decay curves were bi-exponentially fit with the first component fixed to 2.4  
389 and the second component shown. Data shown as mean  $\pm$  SD (n = 15 cells); Welch's t-test, \*\*\*\*  
390  $p < 0.00001$ . (C) FRET efficiency and donor-acceptor population of cells stimulated with LMW, (D) MMW,  
391 (E) HMW, or (F) DMSO denatured MMW. Data shown as mean  $\pm$  SD (n = 15); One-way ANOVA multiple  
392 comparisons Dunnett test, \*  $p < 0.05$ , \*\* $p < 0.01$ , \*\*\* $p < 0.001$ . (G) Brightness vs intensity 2D histogram with  
393 the selected pixels that contribute to the background (black), monomers (red), dimers (green), and  
394 tetramers (blue) in the image. (H) Representative selection map of HEK-293 cells expressing Dectin-1A-  
395 mEmerald unstimulated (left) or stimulated with MMW  $\beta$ -glucan (right) in which Dectin-1 aggregation  
396 states are defined by colored boxes selected in the Brightness vs intensity histogram. (I) Percentage of  
397 aggregates in Dectin-1A-mEmerald receptors and receptor ligand complexes obtained from N&B analysis  
398 before or after stimulation. Data shown as mean  $\pm$  SD (n = 30); One-way ANOVA multiple comparisons  
399 Dunnett test, \*  $p < 0.05$ , \*\*\*\*  $p < 0.00001$ .

400 To better characterize the aggregation states accessible to Dectin-1A, we conducted a  
401 Number and Brightness analysis (N&B) on HEK-293 cells expressing Dectin-1A-  
402 mEmerald. Previous research has described N&B more in depth [61–63]. Briefly, N&B  
403 analysis focuses on fluctuation of detected emission photons originating from  
404 fluorescent molecules that pass through a known observation volume. Statistics of fast  
405 fluctuations of the intensity at each pixel can be used to determine the number and  
406 intensity of the particles diffusing through the observation volume. For example, if the  
407 fluorescent proteins diffuse as a tetrameric protein, we expect to observe emission

408 intensity fluctuation with four times more photons relative to a monomeric fluorescent  
409 protein diffusing through the excitation volume. Receptor aggregation was observed by  
410 stimulating these cells with soluble glucans. A brightness vs intensity 2D histogram of  
411 each pixel in a time series was developed, and selection boxes were drawn to represent  
412 monomers (red box), dimers (green box) and oligomers (blue box) (Fig. 5G). Dectin-1  
413 aggregation state maps of representative untreated (Fig. 5H left panel) and MMW-  
414 stimulated cells (Fig. 5H right panel) were generated using this color scheme. We  
415 observed a significant increase in pixels with a dimer and oligomer brightness in cells  
416 stimulated with MMW and HMW compared to cells that were unstimulated or LMW  
417 stimulated (Fig. 5I). N&B analysis revealed that dimers of Dectin-1A account for the  
418 majority of aggregated state Dectin-1.

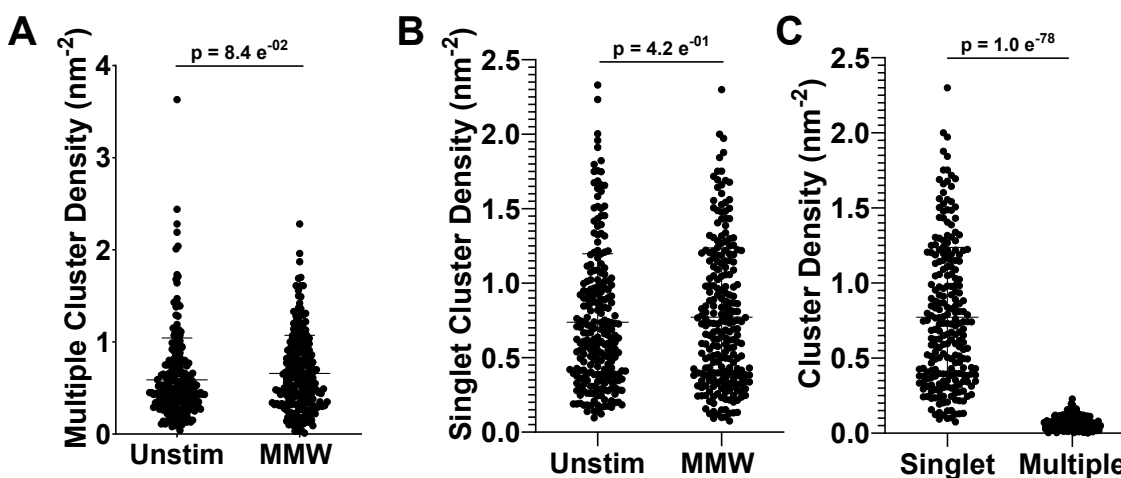

419

420 **Figure 6: Dectin-1A does not form large scale aggregation when stimulated with**  
421 **highly structured  $\beta$ -glucan.**

422 (A) Multiple cluster density of dSTORM analysis of HEK-293 cells expressing Dectin-1A unstimulated or  
423 stimulated with MMW. A singlet cluster is a cluster of localizations determined to arise from 3 or more

424 individual Dectin-1 proteins. (B) Singlet cluster density of DSTORM analysis of HEK-293 cells expressing  
425 Dectin-1A unstimulated or stimulated with MMW. A singlet cluster is a cluster of localizations determined  
426 to arise from a single Dectin-1 protein, or potentially >1 Dectin-1 protein within sub-resolution  
427 displacements from one another. (C) Density of singlet and multiple cluster of Dectin-1A expressing HEK-  
428 293 cells treated with MMW. Data shown as mean  $\pm$  SD (n = 34) with significance assessed by Student's  
429 t Test.

430

### 431 **$\beta$ -glucan induced Dectin-1A aggregates are below 15 nm in size**

432 While FRET-based observations and N&B analysis clearly show the presence of ligand-  
433 induced, molecular-scale aggregation (e.g., dimerization) of Dectin-1A, these methods  
434 are not as well suited to discern the existence of larger scale aggregation of the  
435 receptor (e.g., clusters of tens to hundreds of receptors). We used direct Stochastic  
436 Optical Reconstruction Microscopy (dSTORM) coupled with Hierarchical Single-Emitter  
437 hypothesis Test (H-SET) analysis [13] to resolve aggregation of Dectin-1A before and  
438 after stimulation with MMW glucan. This localization super resolution microscopy  
439 technique accurately resolves objects from the diffraction limit (~300 nm, the resolution  
440 limit of conventional fluorescence microscopy methods) or above, down to ~15 nm (a  
441 typical resolution limit of dSTORM using our configuration). H-SET analysis detected  
442 sites of Dectin-1 labeling as “singlet” objects or “multiple” clustered objects. Multiple  
443 clustered objects are those with three or more resolvable individual Dectin-1 molecules.  
444 Singlet objects are those that appear to contain only a single, resolvable Dectin-1  
445 labeling event, though it is possible that multiple Dectin-1 molecules in very close  
446 proximity (<15 nm separation) would be unresolvable and appear as a singlet object.  
447 We detected no significant change in the density of singlet objects or multiple object

448 clusters before vs after MMW glucan stimulation (Fig. 6A,B; Supplemental Fig. 1).  
449 Consistent with our previous findings, singlet exposures greatly outnumber multiple  
450 exposures on the cell wall surface (Fig. 6C). Localization number per multiple cluster  
451 object did not change with stimulation (Supplemental Fig. 1), suggesting no change in  
452 the number of receptors in such objects. Ripley's K analysis suggests clustering up to  
453 the ~50 nm length scale but not at longer length scales (Supplemental Fig. 1). In the  
454 context of the previous findings showing molecular aggregation at very small scales,  
455 potentially below the resolution limit of dSTORM, we concluded that dSTORM results  
456 indicated that the Dectin-1A aggregates formed upon glucan stimulation are quite small  
457 and below the resolution limit of dSTORM (<15 nm length scale). Because this places  
458 an upper bound on the size of ligand-induced Dectin-1 clusters and we can estimate  
459 that the CRD of Dectin-1 occupies an area approximately 25 nm<sup>2</sup> (PDB: 2BPD; [58,64]),  
460 we conclude that Dectin-1 aggregation after MMW glucan stimulation most likely  
461 involves collections of not more than ~7 receptors.

462 **Dectin-1A is predominantly monomeric in resting cell membranes**



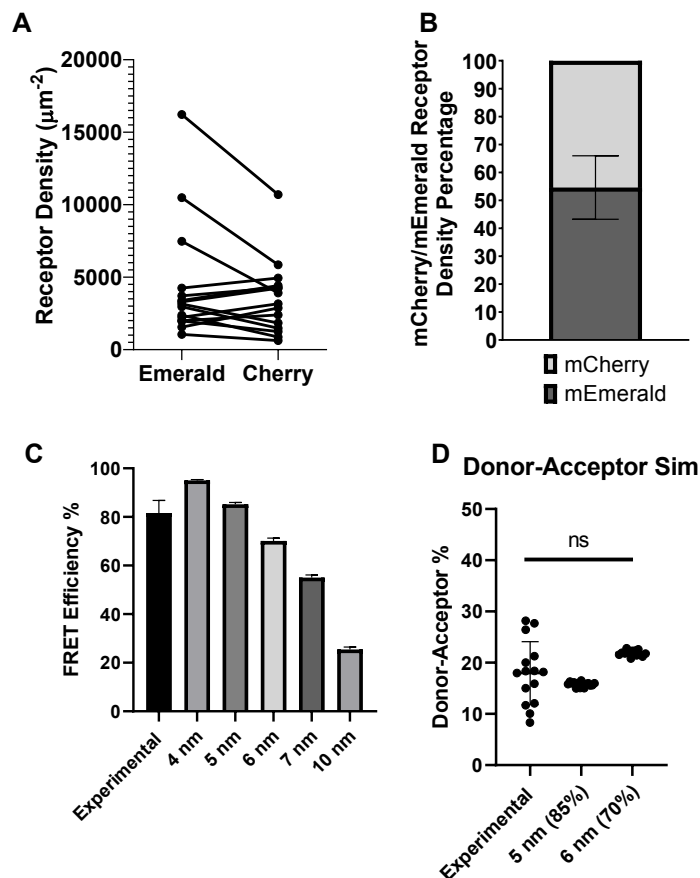

463

464 **Figure 7 Dectin-1A collisional diffusion FLIM-FRET model:**

465 (A) Receptor density of HEK-293 cells co-expressing Dectin-1A-mEmerald and -mCherry. (B) Ratio of  
466 mEmerald/mCherry expression in unstimulated HEK-293 cells. (C) FRET Efficiency (FE) of Dectin-1A  
467 donor/acceptor simulated at different maximum intermolecular radial distances and experimental  
468 observations of FRET in resting cells. (D) Percentage of donors undergoing FRET (Donor-Acceptor  
469 Population) for experimental results from resting cells and FLIM FRET simulations at 5 and 6 nm  
470 maximum radii. Data shown as mean  $\pm$  SD ( $n = 15$  independent simulations or experimental observations  
471 on cells, respectively); One-way ANOVA multiple comparisons Dunnett test.

472

473 FRET-based measurements and N&B analysis reported that the large majority of  
474 Dectin-1 is distributed as monomers in unstimulated cells. However, a minority  
475 population of receptors in states indicative of some close intermolecular interaction was  
476 observed in these cells by both techniques. This may represent random collisional  
477 interactions between Dectin-1 molecules, with no stable receptor oligomer formation.  
478 For instance, FRET may be observed from random collisional interactions without  
479 requiring stable receptor aggregation. Alternatively, it is possible that a small fraction of  
480 Dectin-1 does form dimers or oligomers, even in the absence of glucan. It is difficult to  
481 conclusively distinguish between these alternative hypotheses using only the  
482 experimental results shown above. Therefore, we created a computational model of fully  
483 monomeric Dectin-1 undergoing Brownian 2D diffusion to predict FLIM-FRET results  
484 anticipated from a purely monomeric receptor system. We determined the receptor  
485 density of both donor and acceptor for HEK-293 cells coexpressing Dectin-1A  
486 mEmerald/mCherry by RICS analysis (Fig. 7A). Our results indicated on average  
487 Dectin-1 co-transfected cells contain 54.6% mEmerald and 45.4% mCherry (Fig. 7B).  
488 Therefore, our model was populated by equal proportions of donor and acceptor tagged  
489 Dectin-1 molecules. Their diffusion coefficients were parameterized using data from Fig.  
490 4. The model calculated FRET rates for all donor-acceptor pairs within a specified  
491 maximum radial distance. The maximum radius for experimental FRET observation is  
492 limited by signal-to-noise ratio and other factors. To avoid simulating FRET  
493 measurements at experimentally unrealistic radii, we varied the maximum donor-  
494 acceptor radial distance in a range of 4-10 nm and constrained the model with an  
495 experimentally realistic maximum radius for calculation of FRET. We compared

496 simulated and experimental FRET efficiencies and used maximum radii for simulation  
497 that yielded FRET efficiency in best agreement with observed FRET efficiency on  
498 resting cells. Our results show our experimental FRET efficiency values match model  
499 predictions closely at maximum radii between 5 and 6 nm (Fig. 7C). Simulations at  
500 these radial parameters were then compared to experimental results with respect to the  
501 donor-acceptor population percent that they predicted.

502 We used the predictions of this computational model to test the hypothesis that random  
503 collisional FRET interactions of donors and acceptors is sufficient to explain the basal  
504 FLIM-FRET signal observed experimentally in resting cells. If this model, which  
505 incorporates only collisional interactions between donors and acceptors, predicts a  
506 percent of donors undergoing FRET interactions with acceptors that matches the  
507 experimentally observed value, we would consider that collisional interactions alone are  
508 sufficient to explain the observed basal FRET signal. However, if the model predicts a  
509 value significantly below that experimentally observed, we would propose that a minor  
510 fraction of Dectin-1 molecules may participate in aggregates on cell membranes, even  
511 in the absence of glucan. Using simulations with radial values of 5 and 6 nm, our results  
512 indicate that the experimentally observed amount of Dectin-1 receptors participating in  
513 FRET interactions (Donor-Acceptor population) prior to stimulation match closely to our  
514 simulated results (Fig. 7D). This indicated that the FRET signal we observe prior to  
515 stimulation was attributable to random collisional interactions of monomerically diffusing  
516 receptor expected at the Dectin-1A expression level present in our experimental  
517 system.

518

519 **Dectin-1A dimer/oligomer and contact site formation is more efficient with cells**  
520 **incubated with *C. albicans* containing high glucan exposure.**

521 Throughout the article, we have focused on experiments using soluble glucans. In order  
522 to show Dectin-1 aggregation occurs during fungal cell recognition, we used high  
523 (TRL035) and low (SC5314)  $\beta$ -glucan exposing *C. albicans* strains and examined  
524 Dectin-1 aggregation occurring at the contact sites with these yeast. TRL035 has been  
525 previously shown to have high glucan exposure compared to SC5314 [65]. In addition,  
526 our representative images show TRL035 forming a phagocytic cup more efficiently than  
527 SC5314 (Fig. 8A). We observed no significant difference in FRET efficiency between  
528 any conditions tested (Fig. 8B), similarly to our observations with soluble glucan. This  
529 finding is consonant with a larger trend in the data presented in this report where FRET  
530 efficiency is relatively constant and differences in glucan recognition seem to be mainly  
531 associated with differences in the proportion of Dectin-1A molecules engaged in  
532 molecular aggregates. Our results further show that HEK-293 cells co-transfected with  
533 Dectin-1A-mEmerald and Dectin-1A-mCherry exhibit an increase in the proportion of  
534 aggregated-state receptors from approximately 15% in non-contact site membrane to  
535 about 25% in contact sites of high glucan exposing yeast TRL035 and glucan particles  
536 (Fig. 8C). Interestingly, we did not measure a significant increase in receptor  
537 aggregation between non-contact membranes and contact sites with low glucan  
538 exposing SC5314. The significance and interpretation of these findings is further  
539 discussed below. These results suggest that larger glucan exposure results in an  
540 increase of Dectin-1 in molecular aggregates with associated signaling, resulting in a  
541 more efficient recognition of yeast by the Dectin-1A receptor.

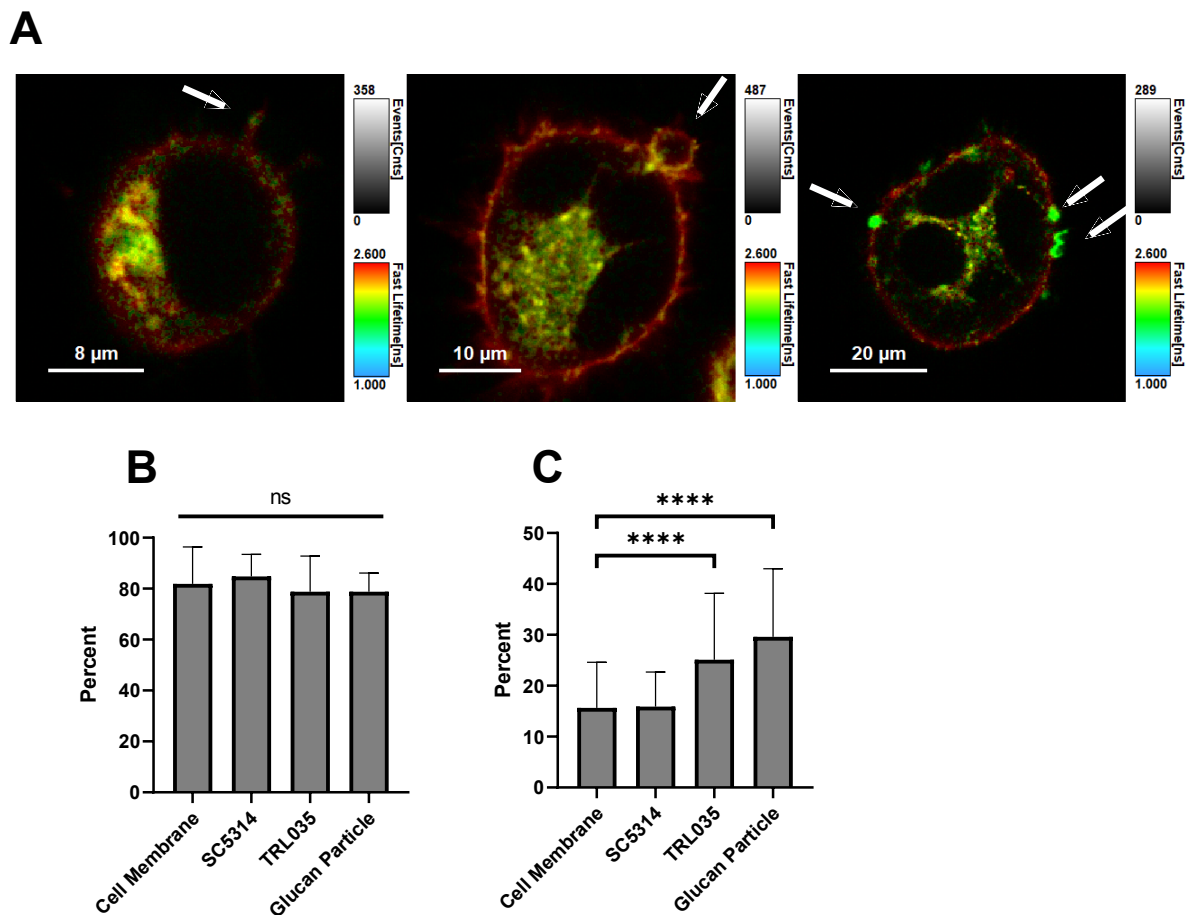

542

543 **Figure 8: Dectin-1A forms more oligomers at fungal contact sites with high  $\beta$ -**  
544 **glucan exposure.**

545 (A) Representative lifetime images of HEK-293 cells co-transfected with Dectin-1A-mEmerald and Dectin-  
546 1A-mCherry incubated with SC5314 (left panel), TRL35 (middle panel) or particulate glucan (right panel).  
547 Transition from redder to greener pixels at contact sites is indicative of increased FRET interactions  
548 between Dectin-1 receptors. (B) FRET efficiency and (C) donor-acceptor population of cell membranes  
549 with no fungal contact, SC5314 (low glucan exposure), TRL35 (high glucan exposure), or particulate  
550 glucan. Data shown as mean  $\pm$  SD (n = 15); One-way ANOVA multiple comparisons Dunnett test, \*\*\*\*  
551  $p < 0.00001$ .

552

553 **Discussion**

554 Our results demonstrate that the structure of  $\beta$ -glucan impacts receptor signaling by  
555 determining the membrane organization and molecular aggregation state of Dectin-1A.

556 We showed that glucans with higher order structure are better able to activate Dectin-

557 1A signaling. Upon activation by stimulatory soluble glucan, Dectin-1A enters

558 aggregated states that contain dimers and higher order oligomers, but these appear to

559 remain as small nanoscale domains containing relatively small numbers of receptors.

560 Comparison of computational modeling and experimental FLIM-FRET data confirms

561 that Dectin-1A exists in a monomeric state in resting cells. Further, monomeric

562 receptors oligomerize and aggregate in a fashion that is dependent upon glucan higher

563 order structure and correlated with the magnitude of membrane proximal signaling

564 downstream of Dectin-1. Finally, we observed that a similar process of increasing

565 Dectin-1 aggregation is seen at contact sites with yeast and fungal-derived particles,

566 and the amount of aggregated state Dectin-1A correlates with the degree of glucan

567 exposure on the surface of the particle. We have summarized all of our quantitative

568 findings in numerical form in Supplemental Table 3 for convenient reference.

569  $\beta$ -glucan is widely distributed on various fungal species as an insoluble component of

570 the cell wall. The soluble form is produced when macrophages recognize fungal

571 surfaces and release enzymes that degrade cell wall glucans [47,48]. These soluble

572 glucans are commonly found in circulation in the serum of patients with fungal infections

573 [49,50].  $\beta$ -glucans possess three different structures: low molecular weights possess a

574 random coil structure while high molecular weight glucans possess either a single or

575 triple helical structure [66]. Furthermore, studies have shown that the complexity of  $\beta$ -

576 glucan is associated with stronger immunostimulatory effects [17,27,29,66,67].  
577 However, these ensemble-based studies concern  $\beta$ -glucan stimulation at the population  
578 level. Therefore, we took a single cell approach to understand nanoscale glucan  
579 signaling dynamics using glucans that vary in size and structure. In line with previous  
580 studies, our results revealed that Dectin-1A activation is influenced by the  $\beta$ -glucan  
581 triple helical structure. Together, these findings demonstrate that  $\beta$ -glucan impacts  
582 receptor signaling due to structure and not merely through its affinity or size.

583 A previous study indicated that the amount of glucan triple helical structure positively  
584 correlates with its binding affinity for receptors on human promonocytic cells, and  
585 biochemical evidence suggested that glucans with more triple helical content exhibit  
586 greater selectivity in receptor interactions on these cells [27]. This evidence suggests  
587 that glucan higher-order structure does impact the character of ligand-receptor  
588 interactions in the context of whole cells. We hypothesized that glucan structure  
589 impacts signaling by modulating the frequency of Dectin-1A dimer/oligomer formation,  
590 thus creating sites where Syk could be better recruited via interactions of its SH2  
591 domains with the phosphorylated YXXL sequence in the Dectin-1A cytosolic tails. Our  
592 FLIM-FRET results reveal that Dectin-1A enters a state of greater molecular  
593 aggregation when stimulated with  $\beta$ -glucans possessing higher ordered helical  
594 structure. These results agree well with a previously described model of (hem)ITAM  
595 signaling from another C-type lectin receptor, CLEC-2, in which the minimum signaling  
596 unit for CLEC-2 is a phosphorylated dimer, enabling recruitment of a single molecule of  
597 Syk [45].

598 In addition, our FLIM-FRET results suggested possible intermolecular interactions  
599 between Dectin-1 proteins even before stimulation with  $\beta$ -glucan. We considered this  
600 possibility carefully because receptor oligomeric states exist in the basal state for some  
601 other C-type lectin receptors, such as DCSIGN, DNGR-1, and NKp80 [68–71].  
602 However, Dectin-1A does not contain cysteine residues in its stalk region which have  
603 been shown to be important in the dimerization of other C-type lectin receptors.  
604 Therefore, it is considered that Dectin-1A, like CLEC-2, is more likely to experience  
605 ligand-induced aggregation in the form of non-disulfide-linked homodimers instead [70–  
606 72]. Our experimental data did show evidence of close molecular interactions between  
607 individual Dectin-1A proteins in the membrane, but comparison with modeling results  
608 indicates that this signal is attributable to an expected level of very transient collisional  
609 interactions between the receptors, given the receptor density and diffusion coefficient  
610 present in our experimental system. Therefore, our membrane biophysical  
611 investigations are most consistent with a model wherein transient Dectin-1A interaction  
612 events may occur in resting cell membranes, but upon ligation by highly structured  
613 glucans, dimers and small oligomers are stabilized, which drives increased efficiency of  
614 Dectin-1 signaling.

615 Throughout our experimental FLIM-FRET datasets, we repeatedly observed significant  
616 glucan induced shifts in the percentage of donors that were participating in FRET  
617 interactions, but little change in FRET efficiency as a function of glucan stimulation.  
618 FRET efficiencies measured were relatively constant across experimental conditions  
619 and also quantitatively fairly high (typically about 75-85%). This suggests that when  
620 FRET was experimentally observed, it was derived from close intermolecular



621 interactions of neighboring Dectin-1A molecules, such as might be expected in an  
622 ordered molecular aggregate, such as a dimer or tetramer. In such an aggregate,  
623 donor-acceptor separation distances are not free to vary over a wide range because,  
624 while the aggregate state exists, those distances are determined by the ordered  
625 structure of the protein-protein complex. Therefore, we think that our data is consistent  
626 with a model wherein Dectin-1 transitions between monomeric forms and ordered  
627 intermolecular aggregate states. We observe that glucan structure controls Dectin-1  
628 aggregation primarily by changing the fraction of receptors in aggregated states.

629 Similarly, our N&B results indicate a formation of dimers and oligomers in cells  
630 stimulated with glucans possessing significant higher order helical structure. These  
631 findings are directly in line with previous crystallographic studies that show monomeric  
632 Dectin-1A CRD in the absence of glucan but able to form dimeric complexes in the  
633 presence of  $\beta$ -glucan [58]. In addition, other studies have shown a ligand-induced  
634 cooperative formation of Dectin-1 CRD tetramers [59]. However, these studies were  
635 performed with truncated receptor ectodomain proteins outside the context of living cell  
636 membranes, so our findings better establish and define the relevance of such ordered  
637 aggregate states to full length Dectin-1 in a more physiologically realistic context.

638 Our dSTORM super resolution results indicate a lack of large aggregates forming.  
639 Because of the resolution limit of 15 nm, it is possible that our dSTORM analysis is  
640 limited in its ability to resolve the formation of small aggregates. Furthermore, it is also  
641 possible that in the soluble form, receptors are internalized rapidly, not allowing for  
642 plasma membrane aggregate formation to be observed. In the case of glucan  
643 encountered at the yeast cell wall, Dectin-1 aggregates may form at the host-fungal cell

644 contact site, where engaged receptor is physically prevented from quickly internalizing.

645 A previous work demonstrated the organized recruitment of Dectin-1 to a “phagocytic  
646 synapse” with glucan particles, where Dectin-1A interactions were presumed to occur  
647 and give rise to signaling [73]. Our study directly demonstrates the aggregation of  
648 Dectin-1 at these surface interaction sites in living cells. In the future, these studies may  
649 be expanded to better characterize the dynamics of receptor recruitment, aggregation  
650 and internalization at phagocytic synapses with fungal pathogens.

651 To determine if this phenomenon occurs at early time points of fungal recognition, we  
652 conducted FLIM-FRET experiments of contact sites of *C. albicans* lab strain SC5314  
653 and our clinical isolate TRL035. TRL035 has been previously described as having  
654 higher glucan exposure compared to SC5314 due to a 3-fold reduction of mannan  
655 structure [65]. Our results indicate an increase in Dectin-1A aggregation at the contact  
656 sites of yeast that have higher glucan exposure as well as contacts with particulate  
657 glucan. We were only able to observe increases in contact site Dectin-1A aggregation  
658 state for yeast and fungal particles with unusually high glucan exposure for *C. albicans*  
659 yeast. No such increase over non-contact membrane sites was detectable at contact  
660 sites with SC5314 *C. albicans* yeast (low glucan exposure due to efficient glucan  
661 masking). This observation does not necessarily imply that there is no Dectin-1  
662 aggregation in response to glucan exposures on *C. albicans* SC5314. The fraction of  
663 Dectin-1 in aggregated states vs the monomeric state may be small enough to be below  
664 our limit of detection by FLIM-FRET in this case.

665 Glucan exposure magnitude is thought to be regulated by masking of glucan by outer  
666 cell wall mannoproteins, providing a very effective mechanism of fungal immune

667 evasion in *C. albicans*. Our previous optical nanoscopy studies of glucan exposure on  
668 *C. albicans* SC5314 and TRL035 have revealed a severely limited cell wall surface area  
669 containing exposed glucan that is capable of multivalent interaction with Dectin-1. It is  
670 reasonable to presume that these limited sites of multivalent glucan exposure may be  
671 the rate limiting factor in determining Dectin-1 aggregation and signaling at phagocytic  
672 synapses. Our previous studies allow us to estimate multivalently-engaging glucan  
673 exposure site density and area (per exposure site) as follows: SC5314—1  $\mu\text{m}^{-2}$  density,  
674  $6.61 \times 10^{-4} \mu\text{m}^2$  area; TRL035—4  $\mu\text{m}^{-2}$  density,  $9.62 \times 10^{-4} \mu\text{m}^2$  area [65]. We previously  
675 measured the total area of contact sites between *C. albicans* and human immature  
676 dendritic cells as  $\sim 10 \mu\text{m}^2$  [74]. Finally, we have estimated (see above) that one Dectin-  
677 1 CRD occupies a footprint of  $\sim 25 \text{nm}^2$ . From these figures, we can estimate that one  
678 typical  $10 \mu\text{m}^2$  phagocytic synapse would contain a maximum of  $\sim 264$  multivalently  
679 engaged Dectin-1 proteins for *C. albicans* SC5314, and maximum  $\sim 385$  multivalently  
680 engaged Dectin-1 for TRL035. For comparison, at the observed receptor density in our  
681 model (Fig. 4), we would expect  $\sim 46000$  total Dectin-1 proteins to be present in this  
682 entire phagocytic contact membrane. However, an important caveat is that, in our model  
683 system, we noted that SC5314 phagocytic synapses were much smaller than those for  
684 TLR035. A smaller contact site would reduce the number of multivalently engaged  
685 receptors in SC5314 synapses considerably relative to the above estimates—perhaps  
686 decreasing the number of multivalently engaged Dectin-1s by approximately an order of  
687 magnitude. So, these estimates emphasize Dectin-1 system is highly sensitive and able  
688 to drive signaling responses when only a few hundred receptors, corresponding to less  
689 than 1% of the total contact site resident Dectin-1 proteins, are aggregated in the

690 phagocytic synapse. Moreover, these results and estimates suggest that fungal  
691 recognition requires the Dectin-1 system to engage in a search for rare sites of  
692 multivalent interaction with glucan. It is very likely that Dectin-1 must cooperate with  
693 other anti-fungal receptors for the purposes of building and stabilizing the fungal contact  
694 wherein this search process operates. This aspect of receptor cooperativity is an  
695 aspect of fungal recognition not present in our simplified experimental model. Future  
696 studies may productively address how other CTLs (i.e., DC-SIGN and CD206, which  
697 establish firm adhesion to abundant fungal surface mannans) may physically and  
698 biochemically assist in Dectin-1's search for rare ligand by building and maintaining a  
699 robust phagocytic synapse.

700 Previous research has shown that glucan unmasking can be caused by enzymatic  
701 degradation of the mannoproteins by macrophages after initial recognition of the fungal  
702 cell [47,48]. Furthermore, anti-fungal drugs have also been shown to unmask fungal cell  
703 walls that then allow for clearance by the host's immune system [13,14]. Our previous  
704 studies have shown that the vast majority of cell wall glucan exposures are only large  
705 enough to engage a single Dectin-1 CRD, suggesting that most glucan exposures may  
706 not be able to multivalently engage Dectin-1. The fact that most glucan exposure sites  
707 on SC5314 *C. albicans* yeast are of this type may explain why we are not able to see  
708 much Dectin-1A aggregation in their contact sites. In contrast, we have reported that  
709 TRL035 has an increased density and size of glucan exposures capable of multivalent  
710 Dectin-1 interactions, which agrees with our finding of increased molecular aggregation  
711 of Dectin-1A at contact sites with TRL035 in the present study. Overall, our findings  
712 have been consistent with a model wherein the ability of Dectin-1 to find and aggregate

713 at multivalent exposures of glucan on fungal cell wall surfaces is a critical determinant of  
714 Dectin-1 dependent innate immune fungal recognition.

715 Overall, these findings indicate that  $\beta$ -glucan structure is required for Dectin-1A to  
716 undergo Syk-dependent signaling. Here we provide evidence in support of a model in  
717 which highly structured glucans induce dimerization and/or oligomerization of the  
718 receptor. This allows their (hem)ITAM domains to become close enough to allow for the  
719 activation of Syk, leading to further signaling cascades. Greater understanding of  
720 receptor activation is required to better understand the role of Dectin-1A and its agonists  
721 as a potential way forward for adjuvant and immunotherapy development. Furthermore,  
722 given the worldwide burden of candidiasis, further experimentation is required to better  
723 understand the role of Dectin-1A in recognition of these pathogens.

724

## 725 **Materials and Methods:**

### 726 **Cell Culture**

727 The HEK-293 (ATCC, #CRL-1573) cell line was maintained in Dulbecco's minimum  
728 essential medium supplemented with 10% Fetal Bovine Serum (FBS), 1%  
729 penicillin/streptomycin, 2mM L-glutamine, 11mM Sodium pyruvate, and 1% HEPES.  
730 Cells were maintained in an incubator at 37°C at 5% CO<sub>2</sub> levels. Cells were maintained  
731 at 37°C, 5% CO<sub>2</sub>, and 75% humidity during imaging.

### 732 **Plasmid**

733 Emerald-Dectin1A-N-10(Addgene plasmid, #56291), Emerald-Dectin1A-C-10 (Addgene  
734 plasmid # 54057), mCherry-Dectin1A-C-10 (Addgene plasmid # 55025), and mCherry-  
735 Dectin1A-N-10 (Addgene plasmid # 55026) was a gift from Michael Davidson.  
736 Transfection with plasmids was performed using standard protocols of Fugene 6  
737 (Promega, #E2691). pUNO1-hDectin-1A (Invivogen) was stably transfected into HEK-  
738 293 cells for use in our calcium studies. HEK-293 cells were selected using Geneticin  
739 (G418 Sulfate) (Thermo-Fischer, #10131035) at 400 ug/ml for 2 weeks.

#### 740 **Fungal Growth/Preparation**

741 *C. albicans* SC5314 (ATCC, MYA-2876) or TRL035 yeast cells were grown from  
742 glycerol stock, stored at  $-80^{\circ}\text{C}$ . Samples were grown in YPD, for 16 h at  $37^{\circ}\text{C}$  in an  
743 orbital shaker at 250 rpm to mid log phase. Following a 3-minute centrifugation at 6000  
744 rpm, the supernatant was removed, and the cells were resuspended in 4%  
745 paraformaldehyde and sterile phosphate-buffered saline (PBS) for 15 minutes. The cells  
746 were centrifuged and washed with sterile PBS 3 times. The cell concentration was then  
747 determined using a disposable hemocytometer (C-Chip; Bulldog Bio catalog no. DHC-  
748 N01).  $3.5 \times 10^6$  cells were resuspended in 1 ml of PBS. 100  $\mu\text{l}$  of the solution was added  
749 to HEK-293 cells in 35 mm dishes 15 minutes prior to imaging.

#### 750 **Soluble Glucans Chromatographic Analysis**

751 Low (LMW, 11 kDa), medium (MMW, 145 kDa), and high (HMW, 450 kDa) molecular  
752 weight  $\beta$ -1,3;1-6-glucan extracted from *S. cerevisiae* cell wall was generous gift from  
753 ImmunoResearch Inc. (Eagan, MN). The molecular weight was assessed by gel  
754 permeation chromatography (GPC) and multi angle light scattering (MALS). Samples

755 (100 µg) were injected and eluted with a mobile phase of 0.15 M sodium chloride  
756 containing 0.02% sodium azide at a flow rate of 0.5 mL/min using two Waters  
757 Ultrahydrogel 500 columns and one Waters Ultrahydrogel 250 column connected  
758 serially. The samples were run with the column temperature at 18°C. The Mw was  
759 calculated using Wyatt Astra software using data resulting from measurements of the  
760 angular variation of scattered light using the MALS detector coupled with the  
761 concentration measured by the DRI signal.

### 762 **Soluble Glucan Linkage Analysis**

763 Desalted and lyophilized samples of the fractions were dissolved in dimethylsulfoxide  
764 (DMSO) and treated with NaOH and methyl iodide to methylate all free hydroxyl groups  
765 [75]. The methylated material was purified by extraction with dichloromethane and  
766 washing with water. The purified material was then hydrolyzed with trifluoroacetic acid,  
767 the reducing ends of the resulting sugars were reduced with NaBD<sub>4</sub>, and then the  
768 resulting free hydroxyl groups were acetylated with acetic anhydride. The mixture of  
769 partially methylated alditol acetates was analyzed by gas chromatography. Each  
770 derivative corresponding to a particular linkage has been identified by a characteristic  
771 retention time and mass spectrum using a mass detector. The relative amount of each  
772 derivative was measured by gas chromatography with flame ionization detection. The  
773 areas obtained for each observed peak are used to calculate the relative amounts of  
774 each type of linkage found in the sample (Table 1). The 3,6-linked residues represent  
775 branch points.

776 **Table 1.**

|                  | <b>LMW</b> | <b>MMW</b> | <b>HMW</b> |
|------------------|------------|------------|------------|
| Terminal Glucose | 6.4        | 5.1        | 5.4        |
| 3-Glucose        | 87.5       | 87.6       | 84.6       |
| 3,6-Glucose      | 3.2        | 3.8        | 4.0        |
| 6-Glucose        | 1.3        | 2.2        | 3.2        |
| 4-Glucose        | 0.1        | 0.2        | 0.1        |
| Other            | 1.5        | 1.1        | 2.7        |

777

#### 778 **Soluble Glucan <sup>1</sup>H NMR Spectroscopy**

779 The samples were dissolved in DMSO-d<sub>6</sub>/D<sub>2</sub>O (6:1 by volume) at 100°C for 1 h.

780 <sup>1</sup>H NMR Spectra were recorded at the University of Minnesota Department of Chemistry

781 NMR lab on a Varian UNITYplus-300 spectrometer at 80°C. The spectra were collected

782 at 300 MHz with 32 scans, a relaxation delay of 1.5 seconds, a pulse of 45°, an

783 acquisition time of 2.0 seconds, and a spectral width of 5999 Hz. Table 2 provides <sup>1</sup>H

784 NMR chemical shifts in all three glucans used in this study as well as literature values

785 [76]. These data, taken together with other characterization methods used, do confirm

786 that the structure of the polysaccharides used in this study conforms to expected results

787 from fungal cell wall glucans (Table 2, Supplemental Fig. 2).

788 **Table 2.**



|     |                     |                              |                                 |                                             |                           |
|-----|---------------------|------------------------------|---------------------------------|---------------------------------------------|---------------------------|
| 789 |                     | <b>H-1 (1,3-<br/>glucan)</b> | <b>H-2, 4, and 5<br/>(1,3-)</b> | <b>H-3 and 6b<br/>(1,3-)</b>                | <b>H-6a (1,3-)</b>        |
| 790 |                     |                              |                                 |                                             |                           |
| 791 | LMW                 | 4.52, d, J =<br>7.8 Hz, 1H   | 3.20-3.33 m, 3H                 | ~3.5, m,<br>(hidden by<br>H <sub>2</sub> O) | 3.72, d, J = 11<br>Hz, 1H |
| 792 |                     |                              |                                 |                                             |                           |
| 793 | MMW                 | 4.52, d, J =<br>8.1 Hz, 1H   | 3.21-3.33 m, 3H                 | ~3.5, m,<br>(hidden by<br>H <sub>2</sub> O) | 3.72, d, J = 11<br>Hz, 1H |
| 794 |                     |                              |                                 |                                             |                           |
| 795 | HMW                 | 4.52, d, J =<br>7.8 Hz, 1H   | 3.20-3.32 m, 3H                 | ~3.5, m,<br>(hidden by<br>H <sub>2</sub> O) | 3.72, d, J = 11<br>Hz, 1H |
| 796 |                     |                              |                                 |                                             |                           |
| 797 | Beta 1,3/1,6 Glucan | 4.52, d, J = 8               | 3.25, m, 3H                     | 3.46, m, 2H                                 | 3.7, d, J = 11            |
| 798 | Literature values   | Hz, 1H                       |                                 |                                             | Hz, 1H                    |
| 799 |                     |                              |                                 |                                             |                           |
| 800 |                     |                              |                                 |                                             |                           |

## 801 **Particulate Glucan**

802 Particulate beta-glucan was prepared from a lyophilized pellet of *C. albicans* SC5314  
803 yeast. These were boiled in 0.75M NaOH for 15 min, residue was collected, and two  
804 additional rounds of the identical treatment were applied. The residue was boiled for 15  
805 min in 2M phosphoric acid, residue was collected and two additional rounds of the  
806 identical treatment were applied. The residue was extracted in ethanol with 1%  
807 phosphoric acid by boiling for 15 min, residue was collected, and two additional rounds  
808 of the identical treatment were applied. The residue was neutralized to pH 7.0, boiled in

809 water for 15 min, residue was collected, and two additional rounds of the identical  
810 treatment were applied. The suspension of glucan microparticles was predominantly  
811 monodisperse and stored in sterile water at 4C. Depyrogenated glassware and  
812 endotoxin free reagents were used in the preparation of glucan particles.

813

#### 814 **Microscopy and Image Analysis**

815 Confocal images were obtained on an Olympus FV1000 laser scanning confocal  
816 microscope (Olympus, Center Valley, PA) built around an IX81 inverted microscope.  
817 Temperature and CO<sub>2</sub> was controlled at 37°C and 5% respectively. A 10x objective lens  
818 (0.40 NA) and a super corrected 60X oil objective lens (1.40 NA), Plan-Apochromat  
819 objective lens was used for imaging. Samples were excited with a 473 nm diode laser  
820 and a 20 mW, 635 nm diode laser. These lines were reflected to the specimen by a  
821 405/473/559/635 multi-edge main dichroic element followed by bandpass emission  
822 filters in front of 2 independent High sensitivity GaAsP PMT detector (HSD1/2).  
823 Specifically, the emission light passed by the main dichroic was directed to our first  
824 detector (HSD1) via SDM560 filter cube and passage through a BA490-540 nm  
825 bandpass filter. Our second detector (HSD2) received light from SDM560 filter cube to  
826 BA575-675 nm bandpass filter.

#### 827 **Fluo-4 Calcium Imaging**

828 HEK-293 cells expressing Dectin-1A were plated at 40,000 cells in a 35 mm (MatTEK  
829 dishes) 24 hours prior to imaging. These cells were loaded with Fluo-4 and Cell Mask  
830 Deep Red (CMDR) at equimolar concentrations of 1 µM in 2 mLs of media for one hour

831 then washed before imaging. Cell Tracker Deep Red was used as a cell cytosolic  
832 volume control to account for cytosolic changes from cell contraction that occurs during  
833 stimulation. For Syk inhibition, plates were treated with 250 nM of Syk Inhibitor (Calbio  
834 chem, #574711) as per the company's specifications. Images were taken at a resolution  
835 of 256 x 256 with a dwell time of 2  $\mu$ s on a 10x objective lens (0.40 NA). A 20 mW, 473  
836 nm diode laser operated at 4% power and CMDR was excited with a 20 mW, 635 nm  
837 diode laser operated at 4% power. Fluorescence of Fluo-4 was collected by a cooled  
838 GaAsP PMT set to 700V, gain 1X and offset of 0%. Our CMDR was collected through  
839 our by a cooled GaAsP PMT detector set to 700V, gain 1X and offset of 0%. 30 frames  
840 prior to stimulation were used to set the basal fluorescence of the fluo-4 dye. After  
841 stimulation with 100  $\mu$ l of 10ug/ml of glucan, cells were imaged for 100 frames. To  
842 assess changes in intracellular calcium concentration, we measured the ratio of Fluo-  
843 4/CMDR intensity in order to correct for any variations in cytoplasmic volume within the  
844 confocal section across the field. This ratio was normalized to 1.0 based on mean pre-  
845 stimulation values (30 frames) and changes in calcium influx were measured as fold  
846 change of this normalized ratio (MFI fold change).

847 For MMW denaturation experiments, soluble  $\beta$ -glucans were weighed and resuspended  
848 in reverse osmosis purified H<sub>2</sub>O. In order to denature medium molecular weight glucan,  
849 we incubated MMW in DMSO or 1M NaOH. To renature the glucan from DMSO, we  
850 placed denatured MMW into Slide-A-Lyzer Dialysis Cassettes (Catalog no. 66203) of a  
851 molecular weight cut-off of 2,000 Da and dialyzed against reverse osmosis purified H<sub>2</sub>O  
852 for 24 hours. To renature glucan from 1M NaOH, the solution was neutralized using 1M  
853 HCl.

## 854 **Protein isolation and immunoblotting**

855 HEK-293 cells stably expressing mEmerald-Dectin-1A were seeded at  $5 \times 10^5$  in 6-well  
856 plates 24 hours prior to the experiment. Cells were stimulated with Low, Medium and  
857 High molecular weight  $\beta$ -glucan with 1 mg/ml for 5 minutes then lysed. Cells were  
858 extracted in 1X lysis buffer (43.9mM HEPES, pH 7.5; 131.7mM NaCl; 1.1% Triton X-  
859 100; 8.8% glycerol; 1x protease inhibitor cocktail; 1mM PMSF; 1mM EGTA). Samples  
860 were centrifuged at 12,000g for 20 min at 4°C and supernatants transferred to fresh  
861 tubes. Protein concentrations were determined by Bradford assay (Bio-Rad Protein  
862 Reagent). NuPAGE LDS sample buffer (4X) with NuPAGE Sample Reducing agent  
863 (10X) was added to samples (1X final concentration). Total proteins (typically 20-50  $\mu$ g)  
864 were subjected to 4-12% sodium dodecyl sulfate-polyacrylamide gel electrophoresis  
865 (SDS-PAGE). Proteins were transferred to Immobilon-FL PVDF transfer membrane  
866 (Millipore Sigma) using NuPAGE transfer buffer. Membranes were blocked with bovine  
867 serum albumin in Tris-buffered saline-Tween-20 (TBS-T; 20 mM Tris, 137 mM NaCl,  
868 0.1% Tween-20) and incubated with primary antibodies overnight at 4°C. Antibodies  
869 purchased from Cell Signaling: Rabbit mAb for p-SYK (Tyr525/526) and  $\beta$ -Actin (13E5),  
870 and mouse mAb Syk (4D10) were used according to manufacturer's recommendations  
871 (1:1000). HRP-conjugated anti-mouse and anti-rabbit secondary antibodies (Cell  
872 Signaling or GE Healthcare) were used at a 1:10,000 dilution. Blots were visualized on  
873 a Li-Cor Odyssey FC imaging system and analyzed with Image Studio.

## 874 **Biolayer interferometry**

875 Advanced Kinetics Biolayer interferometry experiments were conducted using the  
876 Personal Assay BLItz System. Anti-human IgG Fc Capture (AHC) Biosensors tips were

877 initially loaded with Dectin-1A:FC fusion protein (Invivogen, #fc-hdec1a) at 13 ug/ml.  
878 Binding kinetics were obtained for LMW, MMW, HMW, MMW (denatured) and MMW  
879 (renatured) at 0, 10, 50,100, and 250 nM in triplicate. A global fitting was performed on  
880 the curves obtained using the BLItz software.

### 881 **Congo Red Assay for Glucan Structure**

882 A BioTek EON Multiwell Spectrophotometer was used to analyze Congo Red  
883 absorbances. A solution of 8.8  $\mu$ M Congo Red, 0M-1M NaOH solution (1 M, 0.75 M, 0.5  
884 M, 0.25 M, 0.1 M, 0.075 M, 0.05 M, 0.025 M, 0.001 M, 0 M) and LMW, MMW, or HMW  
885  $\beta$ -glucans at 1 mg/ml were analyzed for the denaturation experiments. For the  
886 renaturation experiments, 1mg/ml of  $\beta$ -glucan was denatured at 1M solution then  
887 renatured through neutralization with HCl 24 hrs prior to readings. DMSO denaturation  
888 conditions involved DMSO in water at 0%, 5% and 10%. For the DMSO renaturation  
889 experiments, DMSO was removed by dialysis (see above) prior to spectrophotometer  
890 readings. Absorbance readings were taken at 400-700 nm with 1 nm steps. We note  
891 that DMSO alone induces a positive shift in the absorbance maximum of Congo Red.  
892 This phenomenon mitigates against observation of the full extent of blue shift in Congo  
893 Red between untreated glucan and DMSO denatured glucan and tends to reduce the  
894 statistical significance of this comparison. Therefore, we present control values for  
895 Congo Red with and without DMSO in our data presentation so that the extent of the  
896 solvent's effect on the assay may be apparent. All experiments were conducted in  
897 technical triplication across three independent experimental replicates.

### 898 **Fluorescence Lifetime Imaging Microscopy**

899 HEK-293 cells were plated at 25,000 cells in a 35 mm (MatTEK dishes) 48h prior to  
900 imaging. Cells were transfected with Emerald-Dectin1A-N-10 and mCherry-Dectin1A-N-  
901 10 24 hrs prior to imaging. FLIM-FRET images were obtained using a Leica DMI8  
902 inverted microscope. A Leica Harmonic Compound PL apochromatic CS2 63X water  
903 objective with a correction collar (1.2 NA) was used for imaging. A tunable & pulsed  
904 White Light Laser (470 - 670 nm) was operated at 80 MHz at 3% laser power using a  
905 488 nm notch filter to excite our sample. A scan speed of 200 and a 256 x 256  
906 resolution was used. Two hybrid detectors collected at photons at (512-540 nm) and  
907 (650-700 nm) respectively on the counting mode setting. Temperature was kept at 37  
908 °C using a Tokai Hit Stage Top Incubator for Live Cell Imaging. Lifetime images were  
909 collected using a Pico Harp 300 Fluorescence Lifetime Microscopy Time-Correlated  
910 Single Photon Counting (TCSPC) system. For our glucan stimulated cells, prior to  
911 stimulation 23 frames were collected. 230 frames were taken immediately after  
912 stimulated with  $\beta$ -glucans at a concentration of 10 ug/ml. Analysis was conducted on  
913 minute time points (1-5 minutes). For yeast contact site imaging studies,  $3.5 \times 10^6$  fixed  
914 yeast cells were resuspended in 1 ml of PBS. 100  $\mu$ l of the solution was added to HEK-  
915 293 cells in 35 mm dishes 15 minutes prior to imaging. 23 frames were collected per  
916 cell. Images were collected at a maximum of 45 minutes after the addition of yeast per  
917 plate.

918 Analysis was conducted on the plasma membrane by masking out internal cellular  
919 compartments on the images. For our fungal contact site studies, analysis was  
920 conducted on the plasma membrane that was in contact with the fungus and a separate  
921 masking for plasma membrane that was not in contact with any yeast. A bi-exponential

922 fit was performed to the decay curve. For donor only and donor-acceptor on opposite  
923 sides of the plasma membrane (negative control) the decay curve indicated a negative  
924 amplitude for one of the components, thus indicating a mono-exponential decay was a  
925 more accurate representation. Therefore, decay curves from these samples were  
926 analyzed using a mono-exponential fit. For cells with donor-acceptor on the cytosolic  
927 tail, data was fit to a bi-exponential decay with the first lifetime component being locked  
928 at the donor only lifetime of 2.4 ns ( $\tau_D$ ). Lifetime values of the second component ( $\tau_{DA}$ ) of  
929 the decay curve were used to calculate FRET efficiency using the equation:

930  $FRET\ Efficiency = \left(1 - \frac{\tau_{DA}}{\tau_D}\right) \times 100$ . To determine the number of receptors undergoing a

931 FRET process (Donor-acceptor Population), amplitude ratio between the first  
932 component (AmpD) and the second component(AmpDA) was calculated according to

933 the following formula:  $Donor - Acceptor\ Population = \frac{Amp\ DA}{(AmpD + AmpDA)} \times 100$ .

### 934 **Raster Image Correlation Analysis/Number and Brightness**

935 Protocols on RICS and N&B analysis have been previously described in more depth  
936 [55,77]. HEK-293 cells expressing Emerald-Dectin1A-C-10 were plated at 40,000 cells  
937 in a 35 mm (MatTEK dishes) 24h prior to imaging. Images were collected at 256 x 256  
938 resolution on a 60x 1.4 NA oil immersion objective lens (Olympus PlanApo/IR) with an  
939 optical zoom of 16.4X (0.050  $\mu$ m pixels). Data was collected using a GaAsP PMT  
940 detector operated in photon counting mode. The 473 nm diode laser operated at 0.1%  
941 laser power was used in these images. The Point Spread Function (PSF) radial beam  
942 waist was estimated using 192 nM EFGP in solution and setting the diffusion coefficient  
943 to 90  $\mu$ m<sup>2</sup>/s. Under these conditions the beam waist was determined to be 0.21  $\mu$ m.

944 Immobile features were removed using a 4-frame moving average subtraction. Cells  
945 were stimulated with a final concentration of 1  $\mu\text{g/ml}$  of glucan. After stimulation, 200  
946 frames were collected at a pixel dwell time of 4  $\mu\text{s/pixel}$  (line scan of 1.096 ms) with a  
947 pinhole size of 100  $\mu\text{m}$ .

948 Images collected were also used for our Numbers and Brightness analysis, we used  
949 192 nM EGFP in solution and purified mEmerald-GFP protein to set the average  
950 brightness of our monomeric protein (Supplemental Fig. 3). Furthermore, the S-factor  
951 was calculated using the background image. We divided each brightness distribution by  
952 monomeric, dimeric, and oligomeric sections according to previous research [78]. The  
953 cursors were scaled quadratically and centered at B values of 1.3, 1.6, and 2.35 for  
954 monomers, dimers, and oligomers respectively.

#### 955 **DSTORM analysis**

956 HEK-293 cells, were grown on cleaned and Poly-L-Lysine (0.1 mg/ml) coated coverslips  
957 ( $\sim 5 \times 10^4$  cells/coverslip) within wells of a six-well plate at 37°C 24hrs prior to the  
958 experiment. The cells were then treated with MMW glucan at 1ug/ml for 50 second. The  
959 cells were then fixed with paraformaldehyde (PFA; 4%) for 5 minutes at 37 °C followed  
960 by three washes of PBS.

961 Data acquisition was on an Olympus IX-71 microscope equipped with an objective  
962 based TIRF illuminator using an oil-immersion objective (PlanApo N, 150 $\times$ /1.45 NA;  
963 Olympus) in an oblique illumination configuration. Sample excitation was done using a  
964 637nm laser (Thorlabs, laser diode HL63133DG), with custom-built collimation optics.



965 To minimize the drift that occurred during data acquisition, a self-registration algorithm  
966 was implemented.

967 The Dectin-1A nanodomain density was quantified by Super resolution imaging and  
968 analyzed using (HSET) as a clustering algorithm in MATLAB. The data for 34 cells for  
969 each condition were run through the first pass of HSET to collapse the observations of  
970 the blinking fluorophores into single estimates of the true locations of fluorophore [13].  
971 The second HSET pass determined clustering using DBSCAN algorithm [79] which is  
972 depend on two parameters (minPts) that is the minimum number of object containing a  
973 multi-cluster and the maximum distance between the objects (epsilon). We optimized  
974 these parameters for the datasets used in this study at 3 and 27 nm respectively [65].

#### 975 **Collisional FRET Simulation with Monomeric Dectin-1**

976 For this simulation, first a number of particles were generated based on the numbers of  
977 fluorophore molecules on the membrane in a specific volume on the real cell. As the  
978 experiments have shown that the ratio of donors to acceptors is roughly 50%, in our  
979 model 50% of particles were donors while the rest were of acceptors. The absolute  
980 number of donor and acceptor molecules was based on experimentally determined  
981 Dectin-1A membrane density presented in Fig. 4.

982 The initial location of each particle was defined by drawing random numbers from a  
983 uniform distribution. Throughout the simulation, particle movement was modeled by  
984 using a random walk process. The distance each particle moved at each time point was  
985 determined by the diffusion coefficient that was experimentally determined and reported  
986 in Fig. 4. All particle movements are independent of their type and status.

987 The simulation space included monomer molecules as donors and acceptors. This  
988 simulation space-corresponded to total area of  $0.64 \mu\text{m}^2$  (equivalent to ~20 pixels  
989 membrane area in an experimental FLIM dataset). The total duration of the simulation  
990 was  $97.6 \mu\text{s}$  (equivalent to the total experimental data acquisition time for 20 pixels).  
991 Each simulation run included 3904 sequential pulses with each pulse having the equal  
992 length of 25 ns (0.1 ns time resolution). At the start of each pulse, 30% donors were  
993 selected to act as excited particles. A lifetime value was assigned to each excited  
994 particle by generating a random number from an exponential probability density function  
995 ( $\tau=2.4$  ns; an experimentally determined value of our donor fluorophore). This lifetime  
996 value determined how long each excited donor remained excited.

997 At each time point, after the new location of all particles are calculated (using random  
998 walk process), each excited donor neighborhood is checked for acceptors. The  
999 neighborhood is defined as a disk with radius of 4-10 nm. In the case where there is an  
1000 acceptor present in the neighborhood of a specific excited donor, the energy of donor is  
1001 transferred to the acceptor (see “FRET efficiency” below), which essentially would mean  
1002 that the donor has decayed. Please note that there are two different phenomena that  
1003 would result in the decay of excited donors: FRET (as explained in this paragraph) and  
1004 emission (where the excited donor decay to ground state, according to its characteristic  
1005 fluorescence lifetime). The total probability of excited state decay is the sum of  
1006 probabilities from both processes.

1007 *Simulation FRET efficiency*

1008 With the assumption that the concentration of excited donors is lower than acceptors,  
1009 concentration, we can consider only one donor molecule. In addition, we assume that  
1010 orientation factor for dipolar coupling between donor and acceptor is identical for all  
1011 donor-acceptor pairs because donors and acceptors are considered to be rotating  
1012 freely. Therefore the FRET efficiency equation is as follows: [80]

1013 
$$E = \frac{1}{1 + \sum_i^N \left(\frac{R_i}{R_0}\right)^6}$$

1014 The Förster distance ( $R_0$ ) of the pair of donor and acceptor fluorophores simulated also  
1015 matches that used for donors and acceptors in FLIM FRET experiments, namely  $R_0 =$   
1016 5.24 nm [81]. The FRET efficiency in this simulation calculates the combination of FRET  
1017 resulted by acceptors surrounding one excited donor, which are located at some  
1018 distance from the donor within a specified maximum radial distance, as explained in  
1019 *Results*.

## 1020 **Software**

1021 For the RICS and N&B Data presentation and analysis we used the SimFCS Program  
1022 ([www.lfd.uci.edu](http://www.lfd.uci.edu)). The calcium imaging was analyzed using ImageJ. The FLIM-FRET  
1023 results were analyzed using Symphotime64 software. The BioLayer interferometry  
1024 analysis was done using BLItz Pro software. Statistical analysis was performed with  
1025 GraphPad Prism versions 8.2 (GraphPad Software Inc.). DSTORM analysis and FLIM-  
1026 FRET modeling was performed using MATLAB using our own algorithm  
1027 (<https://github.com/NeumannLab/FRET-Simulation>).

## 1028 **Conflicts of Interest Statement**

1029 EUA, AEA and AKN declare that they have no conflicts of interest relevant to this work.  
1030 We acknowledge that MD and KM are employees of ImmunoResearch, Inc, which  
1031 provided soluble glucans for this study. MD and KM conducted physicochemical  
1032 analysis of these glucans and analyzed the results as reported above, but did not  
1033 determine any other experimental design or data interpretation decisions involved in the  
1034 work.

### 1035 **Acknowledgements**

1036 This research was supported by the University of New Mexico Center for  
1037 Spatiotemporal Modeling of Cell Signaling (STMC; NIH P50GM085273, AKN) and  
1038 R01AI116894 (AKN), EUA was supported by fellowships from the STMC and an NIH  
1039 T32 training grant (NIH T32 AI007538) during the course of this work. We acknowledge  
1040 the competent technical assistance of Ms. Zinia Pervin in relation to BLI determinations  
1041 of Dectin-1A/glucan affinity. We acknowledge Diane Lidke for the many helpful  
1042 discussions on FLIM-FRET and her critical reading and discussion of the manuscript.

1043

### 1044 **References**

- 1045 1. Cleveland AA, Harrison LH, Farley MM, Hollick R, Stein B, Chiller TM, et al.  
1046 Declining Incidence of Candidemia and the Shifting Epidemiology of Candida  
1047 Resistance in Two US Metropolitan Areas, 2008–2013: Results from Population-  
1048 Based Surveillance. Chowdhary A, editor. PLoS One. 2015;10: e0120452.  
1049 doi:10.1371/journal.pone.0120452
- 1050 2. Pfaller MA, Diekema DJ. Epidemiology of invasive candidiasis: a persistent public

- 1051 health problem. Clin Microbiol Rev. 2007;20: 133–63. doi:10.1128/CMR.00029-06
- 1052 3. Cleveland AA, Farley MM, Harrison LH, Stein B, Hollick R, Lockhart SR, et al.  
1053 Changes in incidence and antifungal drug resistance in candidemia: results from  
1054 population-based laboratory surveillance in Atlanta and Baltimore, 2008-2011.  
1055 Clin Infect Dis. 2012;55: 1352–61. doi:10.1093/cid/cis697
- 1056 4. Kao AS, Brandt ME, Pruitt WR, Conn LA, Perkins BA, Stephens DS, et al. The  
1057 Epidemiology of Candidemia in Two United States Cities: Results of a Population-  
1058 Based Active Surveillance. Clin Infect Dis. 1999;29: 1164–1170.  
1059 doi:10.1086/313450
- 1060 5. Hajjeh RA, Sofair AN, Harrison LH, Lyon GM, Arthington-Skaggs BA, Mirza SA, et  
1061 al. Incidence of bloodstream infections due to *Candida* species and in vitro  
1062 susceptibilities of isolates collected from 1998 to 2000 in a population-based  
1063 active surveillance program. J Clin Microbiol. 2004;42: 1519–27.  
1064 doi:10.1128/JCM.42.4.1519-1527.2004
- 1065 6. Antibiotic Resistance Threats in the United States, 2013 | Antibiotic/Antimicrobial  
1066 Resistance | CDC [Internet]. [cited 24 Jul 2018]. Available:  
1067 <https://www.cdc.gov/drugresistance/threat-report-2013/index.html>
- 1068 7. Chaffin WL. *Candida albicans* Cell Wall Proteins. Microbiol Mol Biol Rev. 2008;72:  
1069 495–544. doi:10.1128/mmmbr.00032-07
- 1070 8. Ruiz-Herrera J, Victoria Elorza M, Valentín E, Sentandreu R. Molecular  
1071 organization of the cell wall of *Candida albicans* and its relation to pathogenicity.  
1072 FEMS Yeast Res. 2006;6: 14–29. doi:10.1111/j.1567-1364.2005.00017.x

- 1073 9. Gow NAR, Hube B. Importance of the *Candida albicans* cell wall during  
1074 commensalism and infection. *Current Opinion in Microbiology*. 2012. pp. 406–  
1075 412. doi:10.1016/j.mib.2012.04.005
- 1076 10. Ballou ER, Avelar GM, Childers DS, Mackie J, Bain JM, Wagener J, et al. Lactate  
1077 signalling regulates fungal  $\beta$ -glucan masking and immune evasion. *Nat Microbiol*.  
1078 2016;2. doi:10.1038/nmicrobiol.2016.238
- 1079 11. Sherrington SL, Sorsby E, Mahtey N, Kumwenda P, Lenardon MD, Brown I, et al.  
1080 Adaptation of *Candida albicans* to environmental pH induces cell wall remodelling  
1081 and enhances innate immune recognition. *PLoS Pathog*. 2017;13.  
1082 doi:10.1371/journal.ppat.1006403
- 1083 12. Hopke A, Nicke N, Hidu EE, Degani G, Popolo L, Wheeler RT. Neutrophil Attack  
1084 Triggers Extracellular Trap-Dependent *Candida* Cell Wall Remodeling and Altered  
1085 Immune Recognition. *PLoS Pathog*. 2016;12. doi:10.1371/journal.ppat.1005644
- 1086 13. Lin J, Wester MJ, Graus MS, Lidke KA, Neumann AK. Nanoscopic cell-wall  
1087 architecture of an immunogenic ligand in *Candida albicans* during antifungal drug  
1088 treatment. *Mol Biol Cell*. 2016;27: 1002–14. doi:10.1091/mbc.E15-06-0355
- 1089 14. Pappas HC, Sylejmani R, Graus MS, Donabedian PL, Whitten DG, Neumann AK.  
1090 Antifungal Properties of Cationic Phenylene Ethynylenes and Their Impact on  $\beta$ -  
1091 Glucan Exposure. *Antimicrob Agents Chemother*. 2016;60: 4519–29.  
1092 doi:10.1128/AAC.00317-16
- 1093 15. Wheeler RT, Kombe D, Agarwala SD, Fink GR. Dynamic, morphotype-specific  
1094 *Candida albicans*  $\beta$ -glucan exposure during infection and drug treatment. *PLoS*

- 1095 Pathog. 2008;4. doi:10.1371/journal.ppat.1000227
- 1096 16. Wheeler RT, Fink GR. A drug-sensitive genetic network masks fungi from the  
1097 immune system. PLoS Pathog. 2006;2: 328–339.  
1098 doi:10.1371/journal.ppat.0020035
- 1099 17. Sletmoen M, Stokke BT. Higher order structure of (1,3)- $\beta$ -D-glucans and its  
1100 influence on their biological activities and complexation abilities. Biopolymers.  
1101 2008;89: 310–321. doi:10.1002/bip.20920
- 1102 18. Young SH, Dong WJ, Jacobs RR. Observation of a partially opened triple-helix  
1103 conformation in 1 $\rightarrow$ 3- $\beta$ - glucan by fluorescence resonance energy transfer  
1104 spectroscopy. J Biol Chem. 2000;275: 11874–11879.  
1105 doi:10.1074/jbc.275.16.11874
- 1106 19. Chuah CT, Sarko A, Deslandes Y, Marchessault RH. Triple-Helical Crystalline  
1107 Structure of Curdlan and Paramylon Hydrates<sup>1</sup> [Internet]. Macromolecules. 1983.  
1108 Available: <https://pubs.acs.org/sharingguidelines>
- 1109 20. Yoshioka Y, Uehara N, Saitô H. Conformation-dependent change in antitumor  
1110 activity of linear and branched (1----3)-beta-D-glucans on the basis of  
1111 conformational elucidation by carbon-13 nuclear magnetic resonance  
1112 spectroscopy. Chem Pharm Bull (Tokyo). 1992;40: 1221–6.  
1113 doi:10.1248/cpb.40.1221
- 1114 21. Okobira T, Miyoshi K, Uezu K, Sakurai K, Shinkai S. Molecular dynamics studies  
1115 of side chain effect on the  $\beta$ -1,3-D-glucan triple helix in aqueous solution.  
1116 Biomacromolecules. 2008;9: 783–788. doi:10.1021/bm700511d

- 1117 22. Chihara G, Hamuro J, Maeda Y, Arai Y, Fukuoka F. Fractionation and purification  
1118 of the polysaccharides with marked antitumor activity, especially lentinan, from  
1119 *Lentinus edodes* (Berk.) Sing. (an edible mushroom). *Cancer Res.* 1970;30:  
1120 2776–81. Available: <http://www.ncbi.nlm.nih.gov/pubmed/5530561>
- 1121 23. Zhou L, Zhang Q, Zhang Y, Liu J, Cao Y. The shiitake mushroom-derived  
1122 immuno-stimulant lentinan protects against murine malaria blood-stage infection  
1123 by evoking adaptive immune-responses. *Int Immunopharmacol.* 2009;9: 455–62.  
1124 doi:10.1016/j.intimp.2009.01.010
- 1125 24. Brown GD, Gordon S. Fungal  $\beta$ -Glucans and Mammalian Immunity. *Immunity.*  
1126 2003;19: 311–315. doi:10.1016/S1074-7613(03)00233-4
- 1127 25. Novak M, Vetvicka V. )  $\beta$ -Glucans, History, and the Present: Immunomodulatory  
1128 Aspects and Mechanisms of Action. *J Immunotoxicol.* 2008;5: 47–57.  
1129 doi:10.1080/15476910802019045
- 1130 26. Kim HS, Hong JT, Kim Y, Han S-B. Stimulatory Effect of  $\beta$ -glucans on Immune  
1131 Cells. *Immune Netw.* 2011;11: 191. doi:10.4110/in.2011.11.4.191
- 1132 27. Mueller A, Raptis J, Rice PJ, Kalbfleisch JH, Stout RD, Ensley HE, et al. The  
1133 influence of glucan polymer structure and solution conformation on binding to (1--  
1134 &gt;3)-beta-D-glucan receptors in a human monocyte-like cell line. *Glycobiology.*  
1135 2000;10: 339–46. Available: <http://www.ncbi.nlm.nih.gov/pubmed/10764821>
- 1136 28. Zhang L, Li X, Xu X, Zeng F. Correlation between antitumor activity, molecular  
1137 weight, and conformation of lentinan. *Carbohydr Res.* 2005;340: 1515–21.  
1138 doi:10.1016/j.carres.2005.02.032



- 1139 29. Elder MJ, Webster SJ, Chee R, Williams DL, Hill Gaston JS, Goodall JC.  $\beta$ -  
1140 Glucan Size Controls Dectin-1-Mediated Immune Responses in Human Dendritic  
1141 Cells by Regulating IL-1 $\beta$  Production. *Front Immunol.* 2017;8: 791.  
1142 doi:10.3389/fimmu.2017.00791
- 1143 30. Di Luzio NR, Williams DL, McNamee RB, Edwards BF, Kitahama A. Comparative  
1144 tumor-inhibitory and anti-bacterial activity of soluble and particulate glucan. *Int J*  
1145 *cancer.* 1979;24: 773–9. doi:10.1002/ijc.2910240613
- 1146 31. Tzianabos AO. Polysaccharide immunomodulators as therapeutic agents:  
1147 structural aspects and biologic function. *Clin Microbiol Rev.* 2000;13: 523–33.  
1148 doi:10.1128/cmr.13.4.523-533.2000
- 1149 32. Wang Y, Zhang L, Li Y, Hou X, Zeng F. Correlation of structure to antitumor  
1150 activities of five derivatives of a  $\beta$ -glucan from *Poria cocos sclerotium*. *Carbohydr*  
1151 *Res.* 2004;339: 2567–2574. doi:10.1016/j.carres.2004.08.003
- 1152 33. Smith AJ, Graves B, Child R, Rice PJ, Ma Z, Lowman DW, et al.  
1153 Immunoregulatory Activity of the Natural Product Laminarin Varies Widely as a  
1154 Result of Its Physical Properties. *J Immunol.* 2018;200: 788–799.  
1155 doi:10.4049/jimmunol.1701258
- 1156 34. Suzuki T, Ohno N, Saito K, Yadomae T. Activation of the complement system by  
1157 (1----3)-beta-D-glucans having different degrees of branching and different  
1158 ultrastructures. *J Pharmacobiodyn.* 1992;15: 277–85. Available:  
1159 <http://www.ncbi.nlm.nih.gov/pubmed/1432567>
- 1160 35. Maeda YY, Watanabe ST, Chihara C, Rokutanda M. Denaturation and

- 1161 renaturation of a beta-1,6;1,3-glucan, lentinan, associated with expression of T-  
1162 cell-mediated responses. *Cancer Res.* 1988;48: 671–5. Available:  
1163 <http://www.ncbi.nlm.nih.gov/pubmed/2446749>
- 1164 36. Yanaki T, Ito W, Tabata K, Kojima T, Norisuye T, Takano N, et al. Correlation  
1165 between the antitumor activity of a polysaccharide schizophyllan and its triple-  
1166 helical conformation in dilute aqueous solution. *Biophys Chem.* 1983;17: 337–  
1167 342. doi:10.1016/0301-4622(83)80018-0
- 1168 37. Mueller A, Raptis J, Rice PJ, Kalbfleisch JH, Stout RD, Ensley HE, et al. The  
1169 influence of glucan polymer structure and solution conformation on binding to  
1170 (1→3)-β-D-glucan receptors in a human monocyte-like cell line. *Glycobiology.*  
1171 2000;10: 339–346. doi:10.1093/glycob/10.4.339
- 1172 38. Duggan S, Leonhardt I, Hünninger K, Kurzai O. Host response to *Candida albicans*  
1173 bloodstream infection and sepsis. *Virulence.* 2015; 1–11.  
1174 doi:10.4161/21505594.2014.988096
- 1175 39. Davis SE, Hopke A, Minkin SC, Montedonico AE, Wheeler RT, Reynolds TB, et  
1176 al. Masking of β(1-3)-glucan in the cell wall of *Candida albicans* from detection by  
1177 innate immune cells depends on phosphatidylserine. *Infect Immun.* 2014;82:  
1178 4405–13. doi:10.1128/IAI.01612-14
- 1179 40. Gow NAR, Netea MG, Munro CA, Ferwerda G, Bates S, Mora-Montes HM, et al.  
1180 Immune recognition of *Candida albicans* beta-glucan by dectin-1. *J Infect Dis.*  
1181 2007;196: 1565–71. doi:10.1086/523110
- 1182 41. Brown GD, Taylor PR, Reid DM, Willment JA, Williams DL, Martinez-Pomares L,

- 1183 et al. Dectin-1 is a major  $\beta$ -glucan receptor on macrophages. *J Exp Med*.  
1184 2002;196: 407–412. doi:10.1084/jem.20020470
- 1185 42. Rice PJ, Adams EL, Ozment-Skelton T, Gonzalez AJ, Goldman MP, Lockhart BE,  
1186 et al. Oral delivery and gastrointestinal absorption of soluble glucans stimulate  
1187 increased resistance to infectious challenge. *J Pharmacol Exp Ther*. 2005;314:  
1188 1079–86. doi:10.1124/jpet.105.085415
- 1189 43. O'Neill SK, Getahun A, Gauld SB, Merrell KT, Tamir I, Smith MJ, et al.  
1190 Monophosphorylation of CD79a and CD79b ITAM motifs initiates a SHIP-1  
1191 phosphatase-mediated inhibitory signaling cascade required for B cell anergy.  
1192 *Immunity*. 2011;35: 746–756. doi:10.1016/j.immuni.2011.10.011
- 1193 44. Tomohiro Kurosaki B, AJohnson S, Pao L, Sada K, HiroheYamamura II, Cambier  
1194 JC. Role of the Syk Autophosphorylation Site and SH2 Domains in B Cell Antigen  
1195 Receptor Signaling. doi:10.1084/jem.182.6.1815
- 1196 45. Hughes CE, Pollitt AY, Mori J, Eble JA, Tomlinson MG, Hartwig JH, et al. CLEC-2  
1197 activates Syk through dimerization. *Blood*. 2010;115: 2947–55.  
1198 doi:10.1182/blood-2009-08-237834
- 1199 46. Bartel Y, Bauer B, Steinle A. Modulation of NK cell function by genetically coupled  
1200 C-type lectin-like receptor/ligand pairs encoded in the human natural killer gene  
1201 complex. *Front Immunol*. 2013;4: 362. doi:10.3389/fimmu.2013.00362
- 1202 47. Hino S, Kito A, Yokoshima R, Sugino R, Oshima K, Morita T, et al. Discharge of  
1203 solubilized and Dectin-1-reactive  $\beta$ -glucan from macrophage cells phagocytizing  
1204 insoluble  $\beta$ -glucan particles: Involvement of reactive oxygen species (ROS)-driven

- 1205 degradation. *Biochem Biophys Res Commun.* 2012;421: 329–334.  
1206 doi:10.1016/j.bbrc.2012.04.009
- 1207 48. Hong F, Yan J, Baran JT, Allendorf DJ, Hansen RD, Ostroff GR, et al. Mechanism  
1208 by which orally administered beta-1,3-glucans enhance the tumoricidal activity of  
1209 antitumor monoclonal antibodies in murine tumor models. *J Immunol.* 2004;173:  
1210 797–806. doi:10.4049/jimmunol.173.2.797
- 1211 49. Gonzalez JA, Digby JD, Rice PJ, Breuel KF, DePonti WK, Kalbfleisch JH, et al. At  
1212 low serum glucan concentrations there is an inverse correlation between serum  
1213 glucan and serum cytokine levels in ICU patients with infections. *Int*  
1214 *Immunopharmacol.* 2004;4: 1107–1115. doi:10.1016/J.INTIMP.2004.05.010
- 1215 50. Digby J, Kalbfleisch J, Glenn A, Larsen A, Browder W, Williams D. Serum glucan  
1216 levels are not specific for presence of fungal infections in intensive care unit  
1217 patients. *Clin Diagn Lab Immunol.* 2003;10: 882–5. doi:10.1128/cdli.10.5.882-  
1218 885.2003
- 1219 51. Lowman DW, Ferguson DA, Williams DL. Structural characterization of (1 → 3)-  
1220 D-glucans isolated from blastospore and hyphal forms of *Candida albicans*.  
1221 doi:10.1016/S0008-6215(03)00169-1
- 1222 52. Kogan G, Alföldi J, Masler L. <sup>13</sup>C-nmr spectroscopic investigation of two yeast  
1223 cell wall β-D-glucans. *Biopolymers.* 1988;27: 1055–1063.  
1224 doi:10.1002/bip.360270702
- 1225 53. Nitschke J, Modick H, Busch E, von Rekowski RW, Altenbach H-J, Mölleken H. A  
1226 new colorimetric method to quantify β-1,3-1,6-glucans in comparison with total β-

- 1227 1,3-glucans in edible mushrooms. *Food Chem.* 2011;127: 791–796.
- 1228 doi:10.1016/J.FOODCHEM.2010.12.149
- 1229 54. Brown CM, Dalal RB, Hebert B, Digman MA, Horwitz AR, Gratton E. Raster  
1230 image correlation spectroscopy (RICS) for measuring fast protein dynamics and  
1231 concentrations with a commercial laser scanning confocal microscope. *J Microsc.*  
1232 2008;229: 78–91. doi:10.1111/j.1365-2818.2007.01871.x
- 1233 55. Digman MA, Stakic M, Gratton E. Raster image correlation spectroscopy and  
1234 number and brightness analysis. *Methods Enzymol.* 2013;518: 121–44.  
1235 doi:10.1016/B978-0-12-388422-0.00006-6
- 1236 56. Bauer B, Steinle A. HemITAM: A single tyrosine motif that packs a punch. *Sci*  
1237 *Signal.* 2017;10: 1–10. doi:10.1126/scisignal.aan3676
- 1238 57. Brown GD. Dectin-1: a signalling non-TLR pattern-recognition receptor. *Nat Rev*  
1239 *Immunol.* 2006;6: 33–43. doi:10.1038/nri1745
- 1240 58. Brown J, O’Callaghan CA, Marshall ASJ, Gilbert RJC, Siebold C, Gordon S, et al.  
1241 Structure of the fungal beta-glucan-binding immune receptor dectin-1: implications  
1242 for function. *Protein Sci.* 2007;16: 1042–52. doi:10.1110/ps.072791207
- 1243 59. Dulal HP, Adachi Y, Ohno N, Yamaguchi Y.  $\beta$ -Glucan-induced cooperative  
1244 oligomerization of Dectin-1 C-type lectin-like domain. *Glycobiology.* 2018;28: 612–  
1245 623. doi:10.1093/glycob/cwy039
- 1246 60. Singh DR, Kanvinde P, King C, Pasquale EB, Hristova K. The EphA2 receptor is  
1247 activated through induction of distinct, ligand-dependent oligomeric structures.

- 1248 Commun Biol. 2018;1: 15. doi:10.1038/s42003-018-0017-7
- 1249 61. Digman MA, Dalal R, Horwitz AF, Gratton E. Mapping the number of molecules  
1250 and brightness in the laser scanning microscope. Biophys J. 2008;94: 2320–32.  
1251 doi:10.1529/biophysj.107.114645
- 1252 62. Unruh JR, Gratton E. Analysis of molecular concentration and brightness from  
1253 fluorescence fluctuation data with an electron multiplied CCD camera. Biophys J.  
1254 2008;95: 5385–98. doi:10.1529/biophysj.108.130310
- 1255 63. Trullo A, Corti V, Arza E, Caiolfa VR, Zamai M. Application limits and data  
1256 correction in number of molecules and brightness analysis. Microsc Res Tech.  
1257 2013;76: 1135–1146. doi:10.1002/jemt.22277
- 1258 64. Wester MJ, Lin J, Neumann AK. A computational model for regulation of  
1259 nanoscale glucan exposure in *Candida albicans*. PLoS One. 2017;12.  
1260 doi:10.1371/journal.pone.0188599
- 1261 65. Graus MS, Wester MJ, Lowman DW, Williams DL, Kruppa MD, Martinez CM, et  
1262 al. Mannan Molecular Substructures Control Nanoscale Glucan Exposure in  
1263 *Candida*. Cell Rep. 2018;24: 2432-2442.e5. doi:10.1016/j.celrep.2018.07.088
- 1264 66. OKAZAKI M, ADACHI Y, OHNO N, YADOMAE T. Structure-Activity Relationship  
1265 of (1.3- $\beta$ -D-Glucanase)- $\beta$ -D-Glucans in the Induction of Cytokine Production from  
1266 Macrophages, in Vitro. Biol Pharm Bull. 1995;18: 1320–1327.  
1267 doi:10.1248/bpb.18.1320
- 1268 67. Cleary JA, Kelly GE, Husband AJ. The effect of molecular weight and  $\beta$ -1,6-

- 1269 linkages on priming of macrophage function in mice by (1,3)- $\beta$ -d -glucan.  
1270 Immunol Cell Biol. 1999;77: 395–403. doi:10.1046/j.1440-1711.1999.00848.x
- 1271 68. Itano MS, Graus MS, Pehlke C, Wester MJ, Liu P, Lidke KA, et al. Super-  
1272 resolution imaging of C-type lectin spatial rearrangement within the dendritic cell  
1273 plasma membrane at fungal microbe contact sites. Front Phys. 2014;2.  
1274 doi:10.3389/fphy.2014.00046
- 1275 69. Feinberg H, Guo Y, Mitchell DA, Drickamer K, Weis WI. Extended neck regions  
1276 stabilize tetramers of the receptors DC-SIGN and DC-SIGNR. J Biol Chem.  
1277 2005;280: 1327–35. doi:10.1074/jbc.M409925200
- 1278 70. Vitale M, Falco M, Castriconi R, Parolini S, Zambello R, Semenzato G, et al.  
1279 Identification of NKp80, a novel triggering molecule expressed by human NK  
1280 cells. Eur J Immunol. 2001;31: 233–242. doi:10.1002/1521-  
1281 4141(200101)31:1<233::AID-IMMU233>3.0.CO;2-4
- 1282 71. Hanč P, Schulz O, Fischbach H, Martin SR, Kjær S, Reis e Sousa C. A pH- and  
1283 ionic strength-dependent conformational change in the neck region regulates  
1284 DNGR-1 function in dendritic cells. EMBO J. 2016;35: 2484–2497.  
1285 doi:10.15252/emj.201694695
- 1286 72. Ariizumi K, Shen GL, Shikano S, Xu S, Ritter R, Kumamoto T, et al. Identification  
1287 of a novel, dendritic cell-associated molecule, dectin-1, by subtractive cDNA  
1288 cloning. J Biol Chem. 2000;275: 20157–67. doi:10.1074/jbc.M909512199
- 1289 73. Goodridge HS, Reyes CN, Becker CA, Katsumoto TR, Ma J, Wolf AJ, et al.  
1290 Activation of the innate immune receptor Dectin-1 upon formation of a “phagocytic

- 1291 synapse". *Nature*. 2011;472: 471–5. doi:10.1038/nature10071
- 1292 74. Graus MS, Pehlke C, Wester MJ, Davidson LB, Steinberg SL, Neumann AK. A  
1293 New Tool to Quantify Receptor Recruitment to Cell Contact Sites during Host-  
1294 Pathogen Interaction. Gabhann F Mac, editor. *PLoS Comput Biol*. 2014;10:  
1295 e1003639. doi:10.1371/journal.pcbi.1003639
- 1296 75. Needs PW, Selvendran RR. Avoiding oxidative degradation during sodium  
1297 hydroxide/methyl iodide-mediated carbohydrate methylation in dimethyl sulfoxide.  
1298 *Carbohydr Res*. 1993;245: 1–10. doi:10.1016/0008-6215(93)80055-J
- 1299 76. Kim YT, Kim EH, Cheong C, Williams DL, Kim CW, Lim ST. Structural  
1300 characterization of  $\beta$ -D-(1  $\rightarrow$  3, 1  $\rightarrow$  6)-linked glucans using NMR spectroscopy.  
1301 *Carbohydr Res*. 2000;328: 331–341. doi:10.1016/S0008-6215(00)00105-1
- 1302 77. Youker RT, Teng H. Measuring protein dynamics in live cells: protocols and  
1303 practical considerations for fluorescence fluctuation microscopy. *J Biomed Opt*.  
1304 2014;19: 090801. doi:10.1117/1.jbo.19.9.090801
- 1305 78. Planes N, Digman MA, Vanderheyden PPML, Gratton E, Caballero-George C.  
1306 Number and brightness analysis to study spatio-temporal distribution of the  
1307 angiotensin II AT1 and the endothelin-1 ETA receptors: Influence of ligand  
1308 binding. *Biochim Biophys Acta - Gen Subj*. 2019;1863: 917–924.  
1309 doi:10.1016/J.BBAGEN.2019.03.004
- 1310 79. Ester M, Ester M, Kriegel H-P, Sander J, Xu X. A density-based algorithm for  
1311 discovering clusters in large spatial databases with noise. 1996; 226--231.  
1312 Available: <http://citeseer.ist.psu.edu/viewdoc/summary?doi=10.1.1.121.9220>



1313 80. Wolber PK, Hudson BS. An analytic solution to the Förster energy transfer  
1314 problem in two dimensions. *Biophys J.* 1979;28: 197–210. doi:10.1016/S0006-  
1315 3495(79)85171-1

1316 81. Akrap N, Seidel T, Barisas BG. Förster distances for fluorescence resonant  
1317 energy transfer between mCherry and other visible fluorescent proteins. *Anal*  
1318 *Biochem.* 2010;402: 105–106. doi:10.1016/J.AB.2010.03.026

1319

1320

1321

1322

1323

1324

1325 **Supplemental Materials**

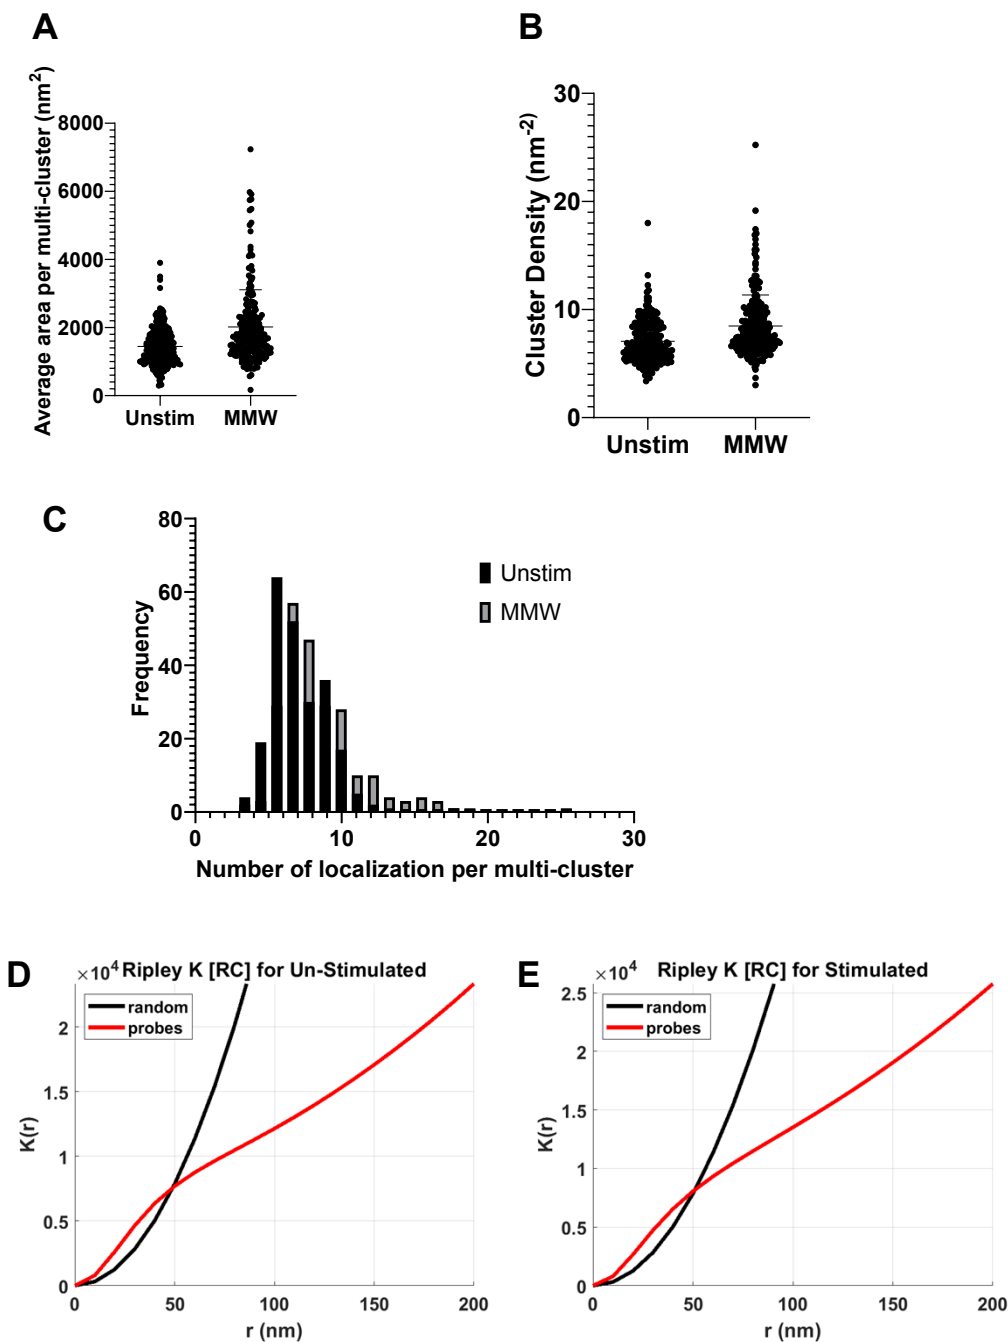

1326

## 1327 Supplemental Figure 1: DSTORM Clustering Analysis

1328 (A) Average area of multi-cluster in dSTORM analysis of HEK-293 cells expressing Dectin-1A

1329 unstimulated or stimulated with MMW. (B) Cluster density of DSTORM analysis of HEK-293 cells

1330 expressing Dectin-1A unstimulated or stimulated with MMW. (C) Histogram analysis of the number of

1331 localizations of HEK-293 cells expressing Dectin-1A unstimulated or stimulated with MMW. (D) Spatial  
1332 point pattern analysis with Ripley's K function of HEK-293 cells expressing Dectin-1A unstimulated or  
1333 stimulated with (E) MMW. Data shown as mean  $\pm$  SD (n = 34)

1334

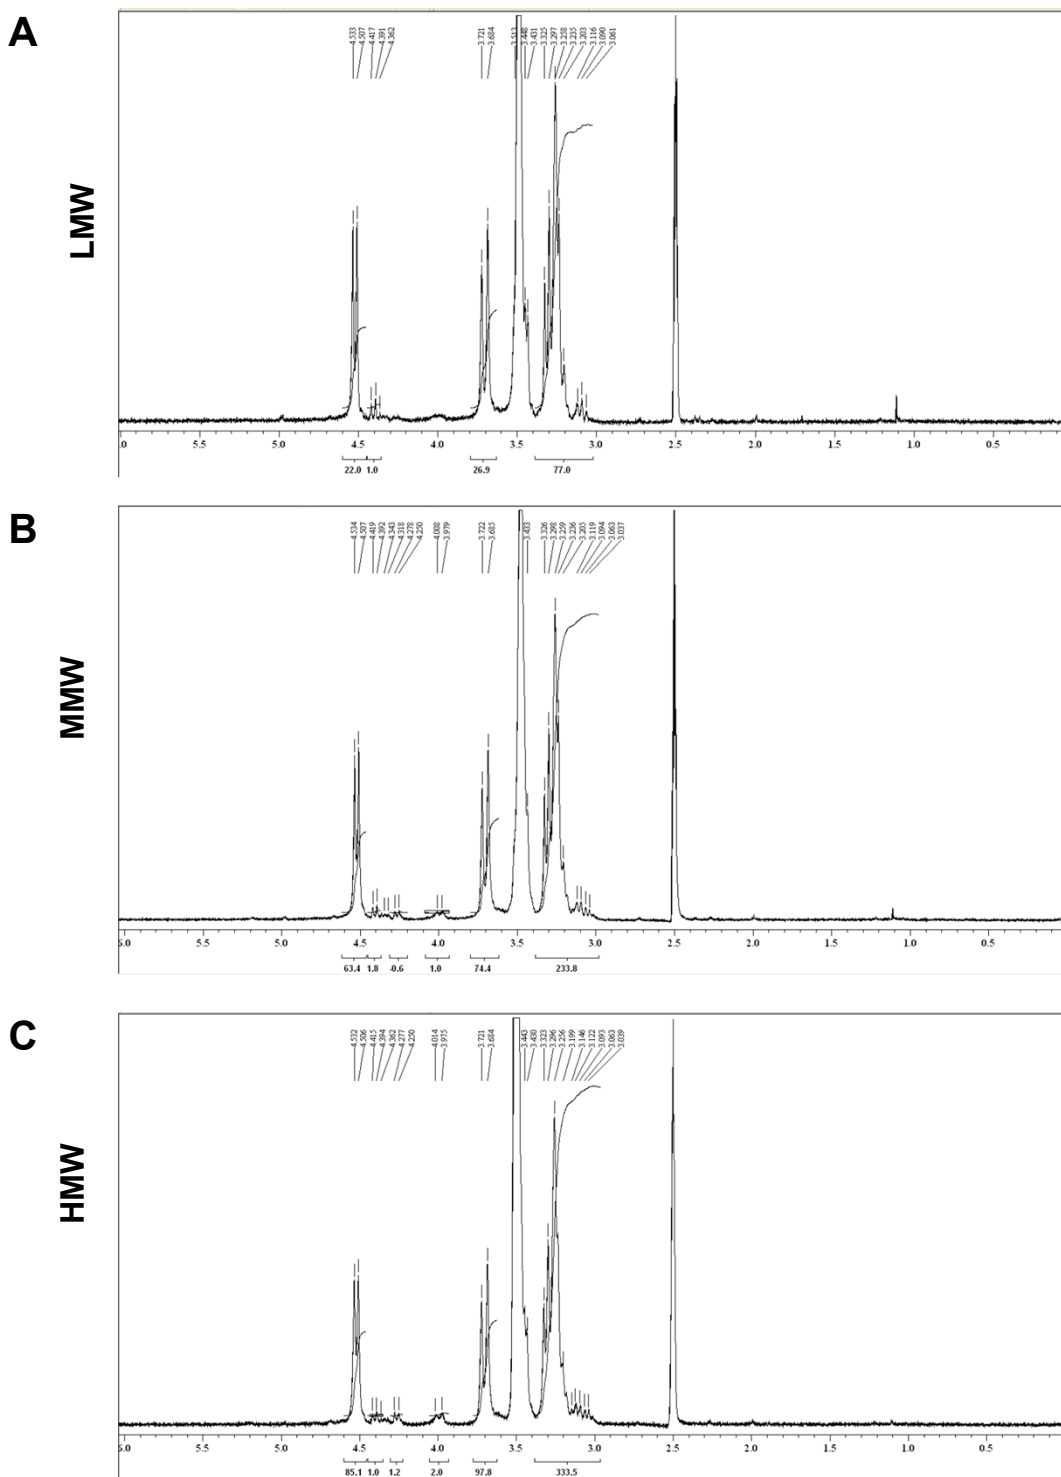

1335

1336 **Supplemental Figure 2: <sup>1</sup>H NMR Spectrum**

1337 (A) <sup>1</sup>H NMR spectrum of LMW, (B) MMW, and (C) HMW.

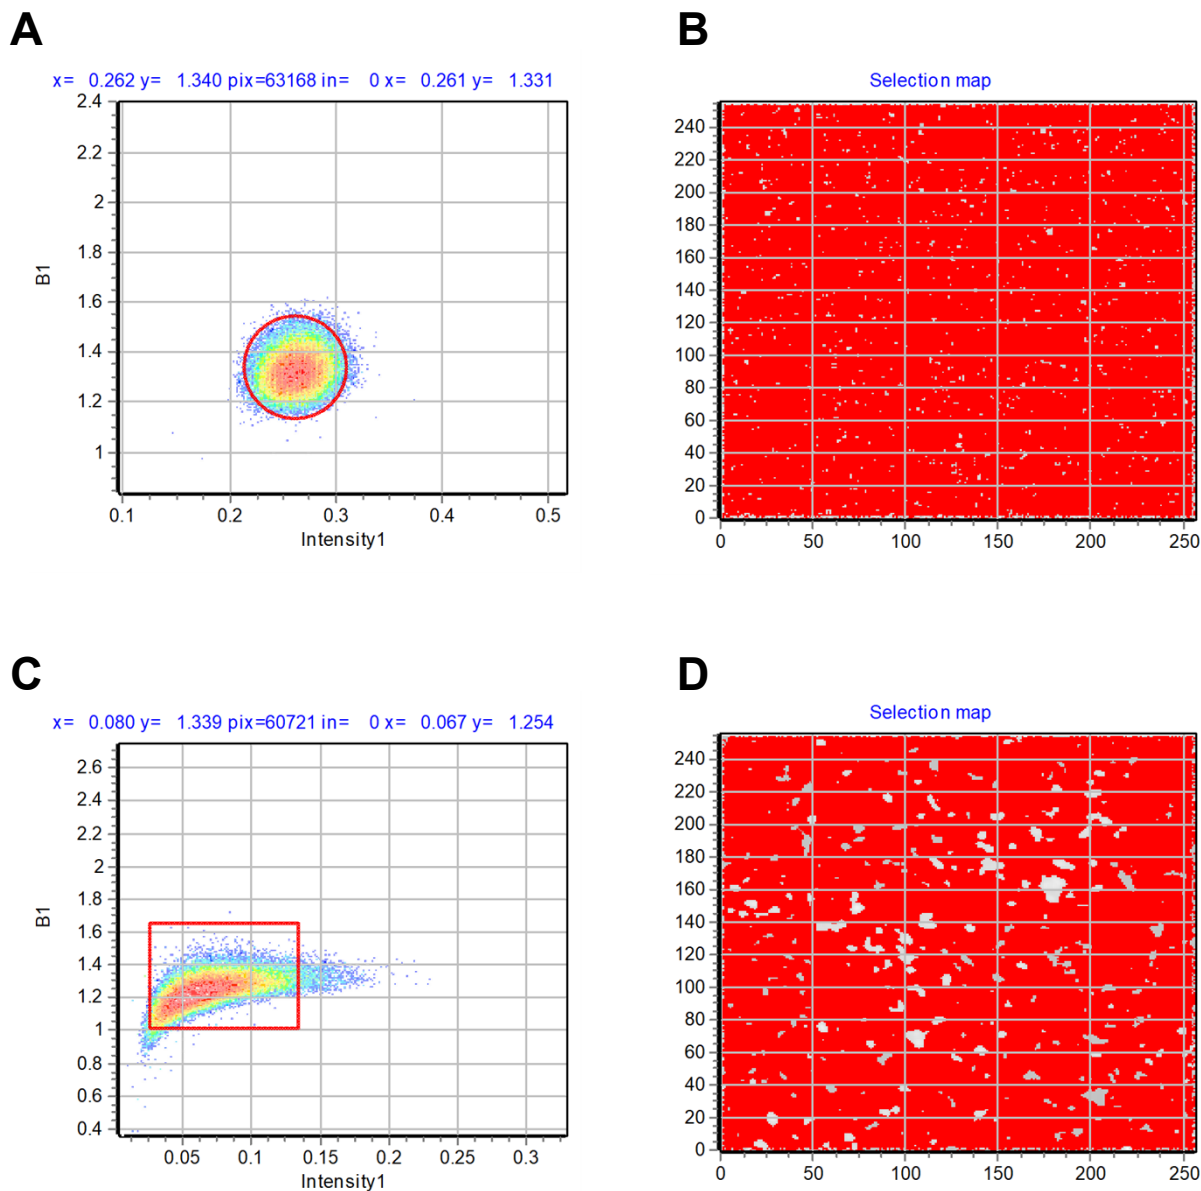

1338

1339 **Supplemental Figure 3: Numbers and brightness analysis calibration**

1340 (A) Brightness vs intensity 2D histogram of purified EGFP or mEmerald-Dectin-1A (C) with the selected  
1341 pixels that contribute to the monomers (red) in the image. (B) Representative selection map of purified  
1342 EGFP or mEmerald-Dectin-1A (D) in which the fluorescent protein populations are defined by colored  
1343 cursors selected in the Brightness vs intensity histogram.

1344

1345

1346 **Supplemental Table 1.**

| Table of Values |            |          |            |          |            |          |               |          |
|-----------------|------------|----------|------------|----------|------------|----------|---------------|----------|
|                 | LMW        |          | MMW        |          | HMW        |          |               |          |
| Max Calcium     | 1.2        |          | 2.5        |          | 1.8        |          |               |          |
| Amplitude       |            |          |            |          |            |          |               |          |
|                 | LMW        |          | MMW        |          | HMW        |          | MMW           |          |
|                 |            |          |            |          |            |          | Denatured     |          |
|                 |            |          |            |          |            |          | Renatured     |          |
| Kd<br>(nM)      | 1.93       |          | 1.62       |          | 0.43       |          | 1.02          |          |
|                 |            |          |            |          |            |          |               |          |
|                 | LMW        |          | MMW        |          | HMW        |          | MMW Denatured |          |
| Min             | FRET       | Donor-   | FRET       | Donor-   | FRET       | Donor-   | FRET          | Donor-   |
|                 | Efficiency | Acceptor | Efficiency | Acceptor | Efficiency | Acceptor | Efficiency    | Acceptor |
|                 | %          | %        | %          | %        | %          | %        | %             | %        |
| 0               | 83.3       | 17.7     | 76.5       | 15.3     | 86.1       | 14.5     | 87.5          | 15.9     |
| 1               | 79.1       | 17.1     | 77.0       | 22.8     | 80.1       | 19.5     | 86.7          | 15.8     |
| 2               | 79.1       | 17.9     | 74.3       | 22.1     | 78.9       | 19.8     | 86.2          | 15.1     |
| 3               | 78.5       | 18.1     | 77.1       | 23.7     | 78.9       | 21.7     | 86.3          | 15.2     |
| 4               | 78.2       | 19.5     | 72.1       | 25.7     | 79.5       | 22.5     | 84.1          | 16.1     |
| 5               | 77.9       | 18.8     | 71.9       | 28.2     | 79.5       | 23.7     | 84.5          | 14.1     |

|                 | N&B                                          |                                               |                                               | RICS                                               |                                      |
|-----------------|----------------------------------------------|-----------------------------------------------|-----------------------------------------------|----------------------------------------------------|--------------------------------------|
|                 | Monomers %                                   | Dimers %                                      | Oligomers %                                   | Diffusion Coefficient ( $\mu\text{m}^2/\text{s}$ ) | Number of Receptors/ $\mu\text{m}^2$ |
| Unstimulated    | 74.0                                         | 21.4                                          | 4.6                                           | 1.12                                               | 4608                                 |
| LMW             | 69.5                                         | 20.6                                          | 9.9                                           | 0.90                                               | 3920                                 |
| MMW             | 27.5                                         | 52.5                                          | 20.0                                          | 0.37                                               | 1768                                 |
| HMW             | 37.5                                         | 48.7                                          | 13.8                                          | 0.37                                               | 1942                                 |
|                 |                                              |                                               |                                               |                                                    |                                      |
|                 | Singlet Cluster Density ( $\text{nm}^{-2}$ ) | Multiple Cluster Density ( $\text{nm}^{-2}$ ) | Density of Localizations ( $\text{nm}^{-2}$ ) | Average Area per cluster( $\text{nm}^2$ )          |                                      |
| Unstimulated    | 0.74                                         | 0.59                                          | 7.06                                          | 1444                                               |                                      |
| MMW             | 0.77                                         | 0.66                                          | 8.47                                          | 2016                                               |                                      |
|                 |                                              |                                               |                                               |                                                    |                                      |
|                 | FRET Efficiency %                            |                                               | Donor- Acceptor %                             |                                                    |                                      |
| Cell Membrane   | 81.8                                         |                                               | 15.7                                          |                                                    |                                      |
| SC5314          | 84.8                                         |                                               | 15.9                                          |                                                    |                                      |
| TRL035          | 78.8                                         |                                               | 25.1                                          |                                                    |                                      |
| Glucan Particle | 78.8                                         |                                               | 29.6                                          |                                                    |                                      |
